# Supplementary material for: N-Tosylhydrazone directed annulation via C–H/N–N bond activation in Ru(ii)/PEG-400 as homogeneous recyclable catalytic system: a green synthesis of isoquinolines
Source: Royal Society of Chemistry journal article supplement (doi:10.1039/c8ob01082j), 2018-01-01

## Supplementary Information

### ***N*-Tosylhydrazone directed annulation *via* C-H/N-N bond activation in Ru(II)/PEG-400 as homogeneous recyclable catalytic system: a green synthesis of isoquinolines**

Dewal S. Deshmukh and Bhalchandra M. Bhanage\*

Department of Chemistry, Institute of Chemical Technology, Matunga, Mumbai-400019, India.

Tel.: +91-22-33612603; Fax: +91-22-33611020

E-mail: [bm.bhanage@gmail.com](mailto:bm.bhanage@gmail.com), [bm.bhanage@ictmumbai.edu.in](mailto:bm.bhanage@ictmumbai.edu.in)

## Table of Contents

1. General experimental procedure for synthesis of *N*-tosylhydrazones.....1
2. Copies for <sup>1</sup>H NMR and <sup>13</sup>C NMR of the isoquinoline products (**3**).....2

### 1. General experimental procedure for synthesis of *N*-tosylhydrazones:

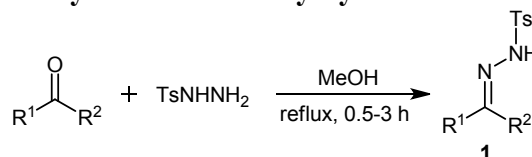

A mixture of carbonyl compound (10 mmol) and tosylhydrazide (10 mmol) in MeOH (15 mL) were heated at 65 °C for 0.5-3 h to obtain the corresponding *N*-tosylhydrazone as white precipitate. After completion of reaction, the solvent was evaporated under reduced pressure. The crystalline product was washed thoroughly with 30 mL of hexane (4-5 times) and dried to afford pure product.

*N*-tosylhydrazones (**1a – 1v**) were synthesized using the above method:

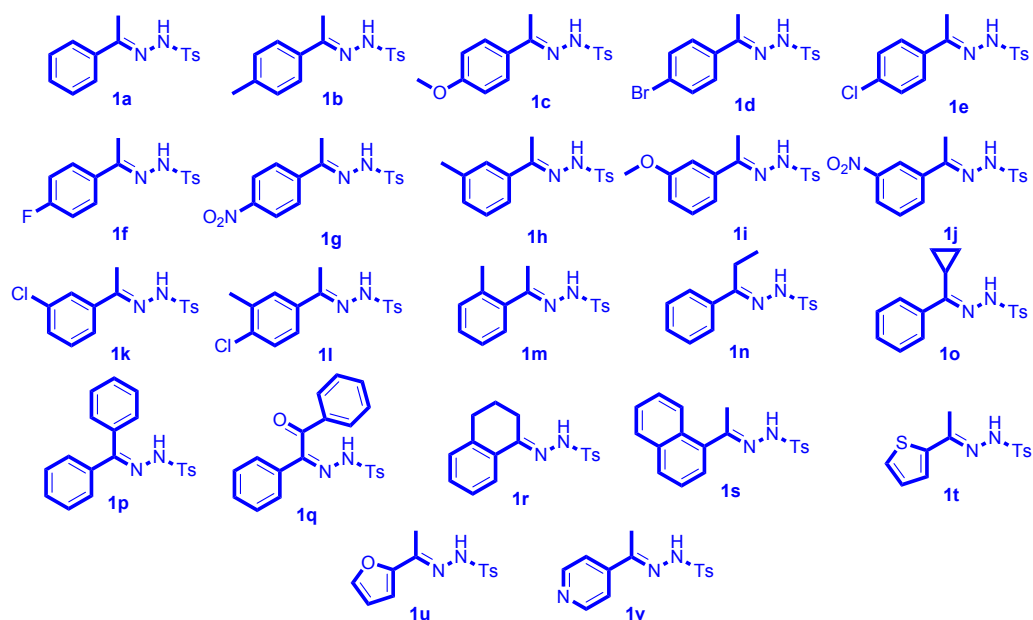

## 2. Copies for $^1\text{H}$ NMR and $^{13}\text{C}$ NMR of the isoquinoline products (**3**)

### $^1\text{H}$ NMR of 1-Methyl-3,4-diphenylisoquinoline (**3aa**)

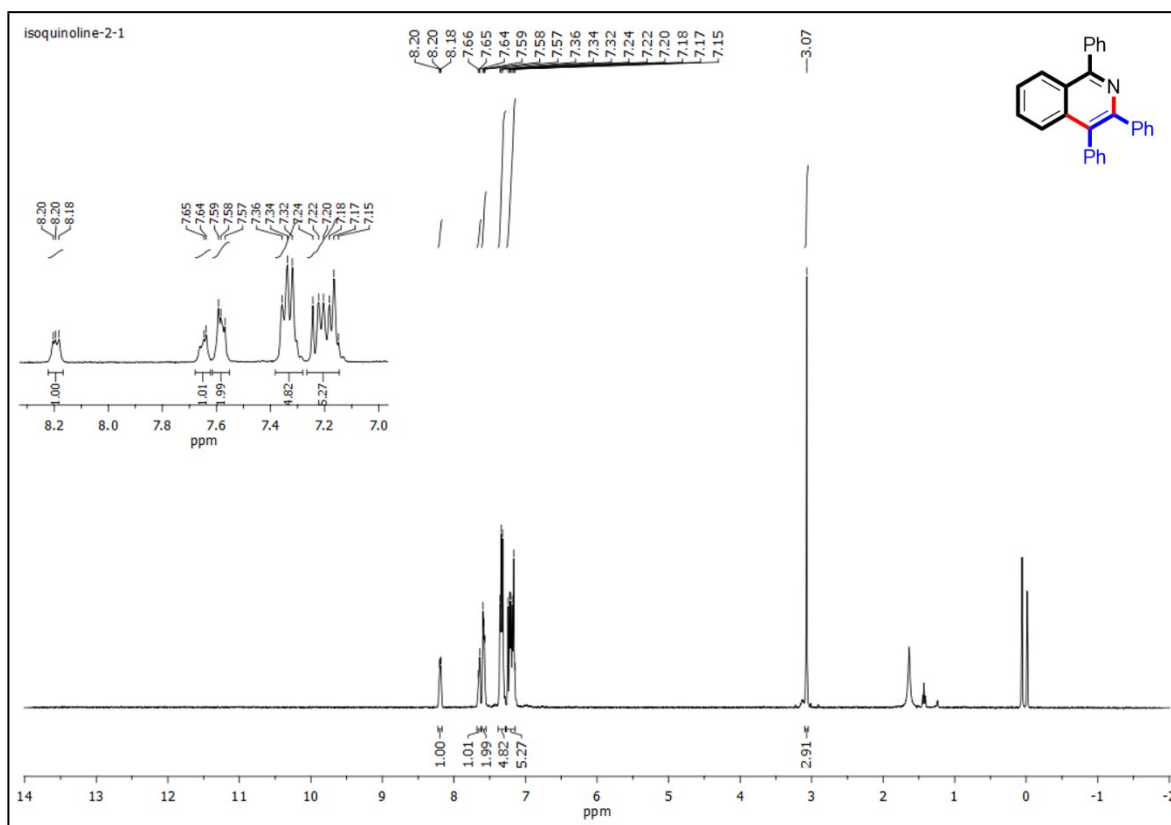

# <sup>1</sup>H & <sup>13</sup>C NMR of 1,6-Dimethyl-3,4-diphenylisoquinoline (3ba)

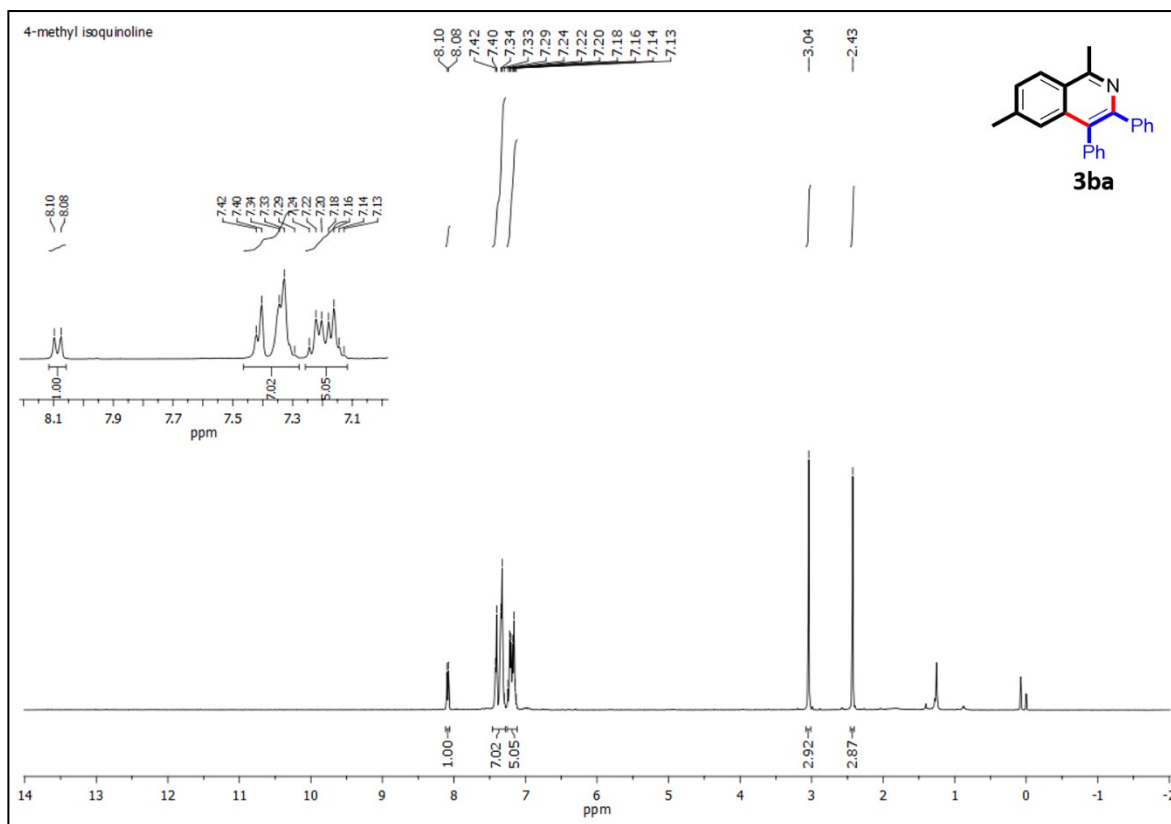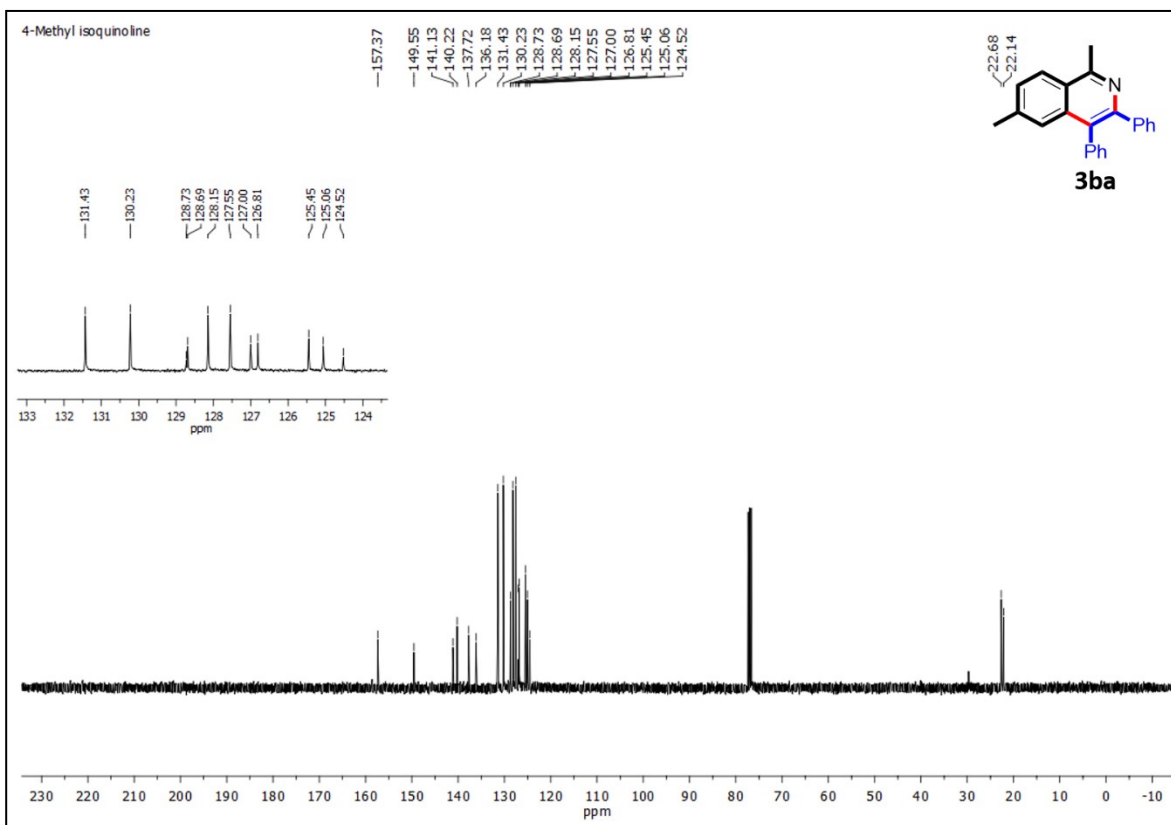

**<sup>1</sup>H & <sup>13</sup>C NMR of 6-Methoxy-1-methyl-3,4-diphenylisoquinoline (3ca)**

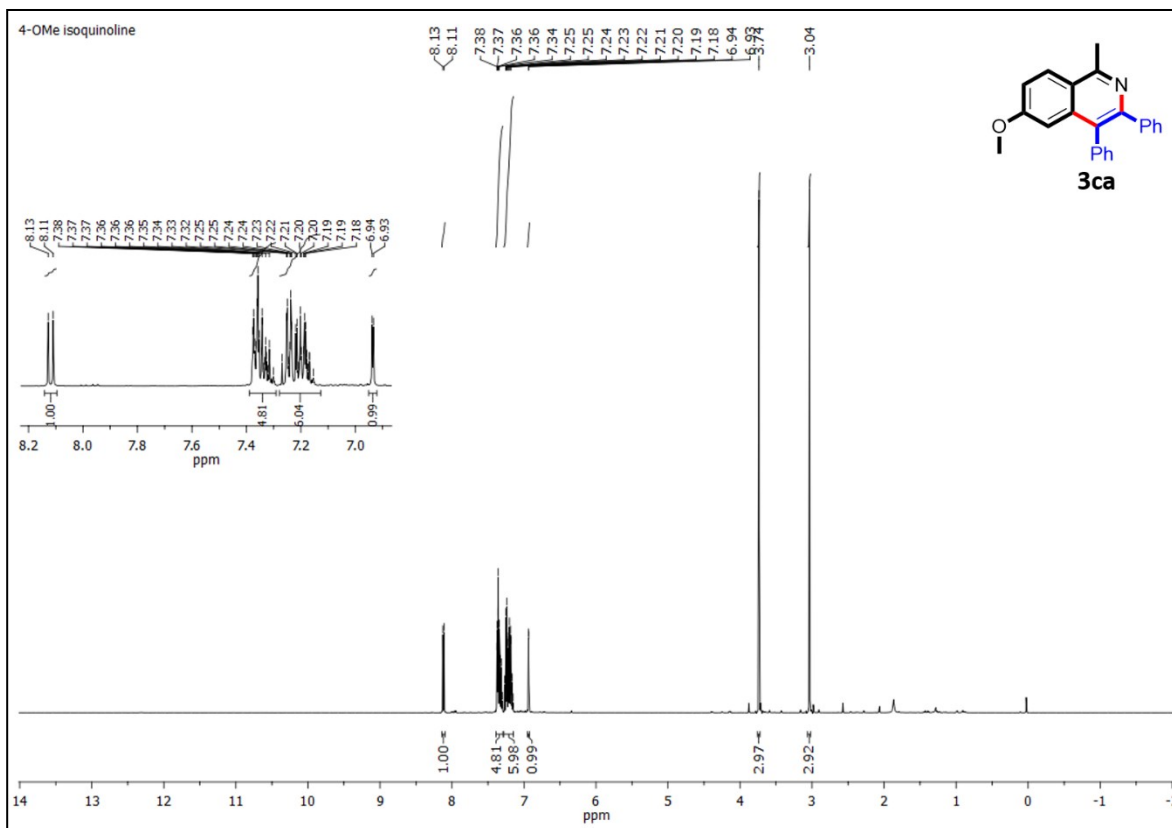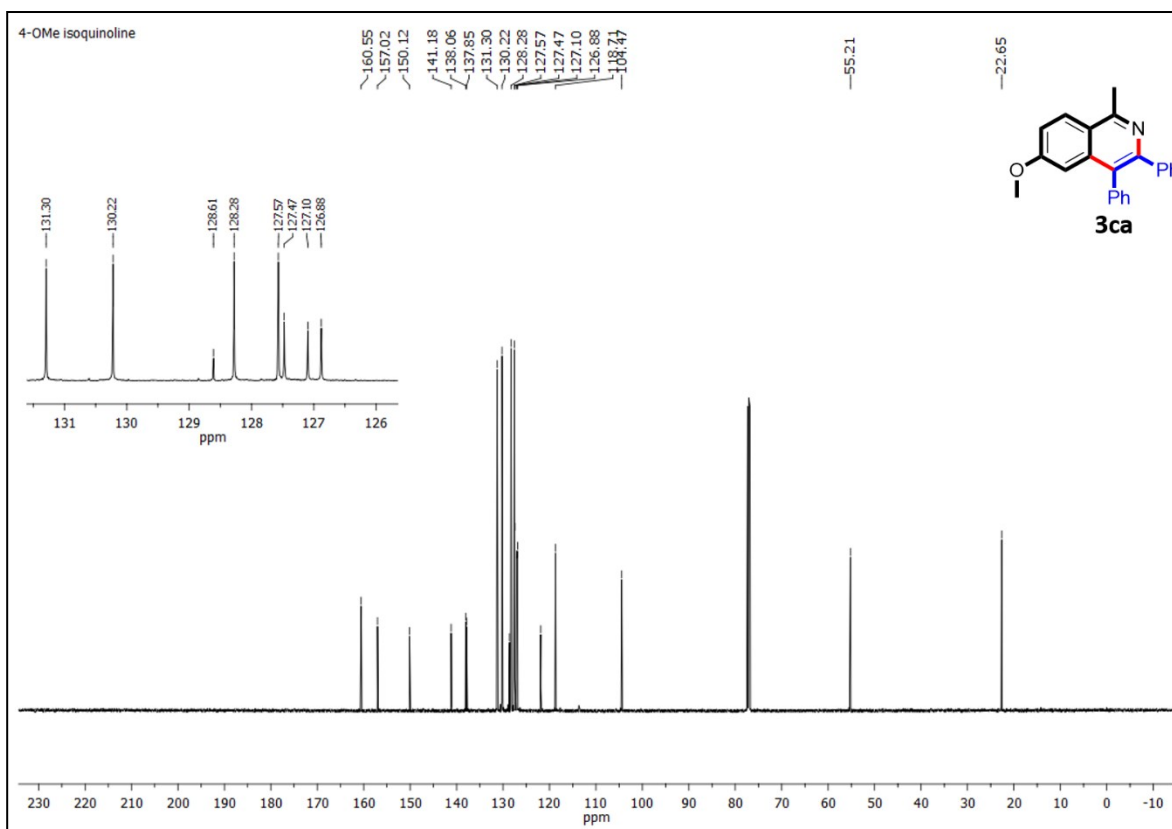

### <sup>1</sup>H & <sup>13</sup>C NMR of 6-Bromo-1-methyl-3,4-diphenylisoquinoline (3da)

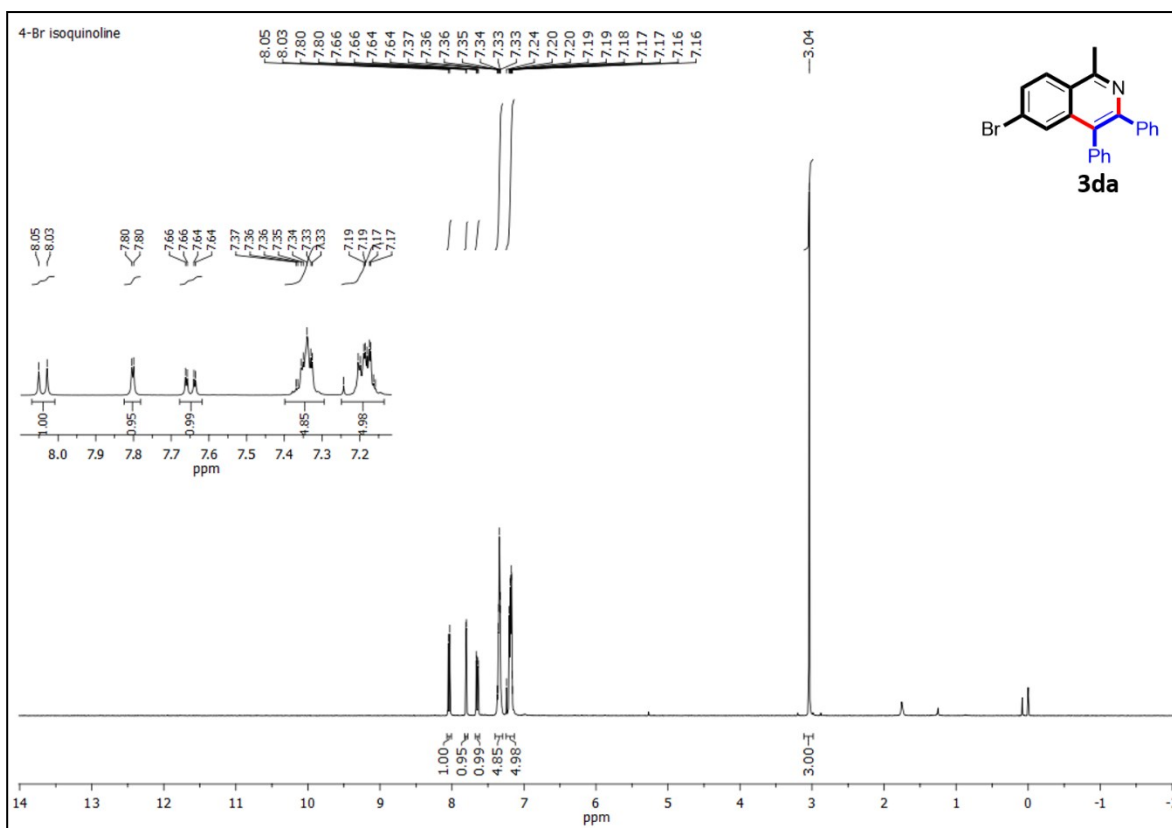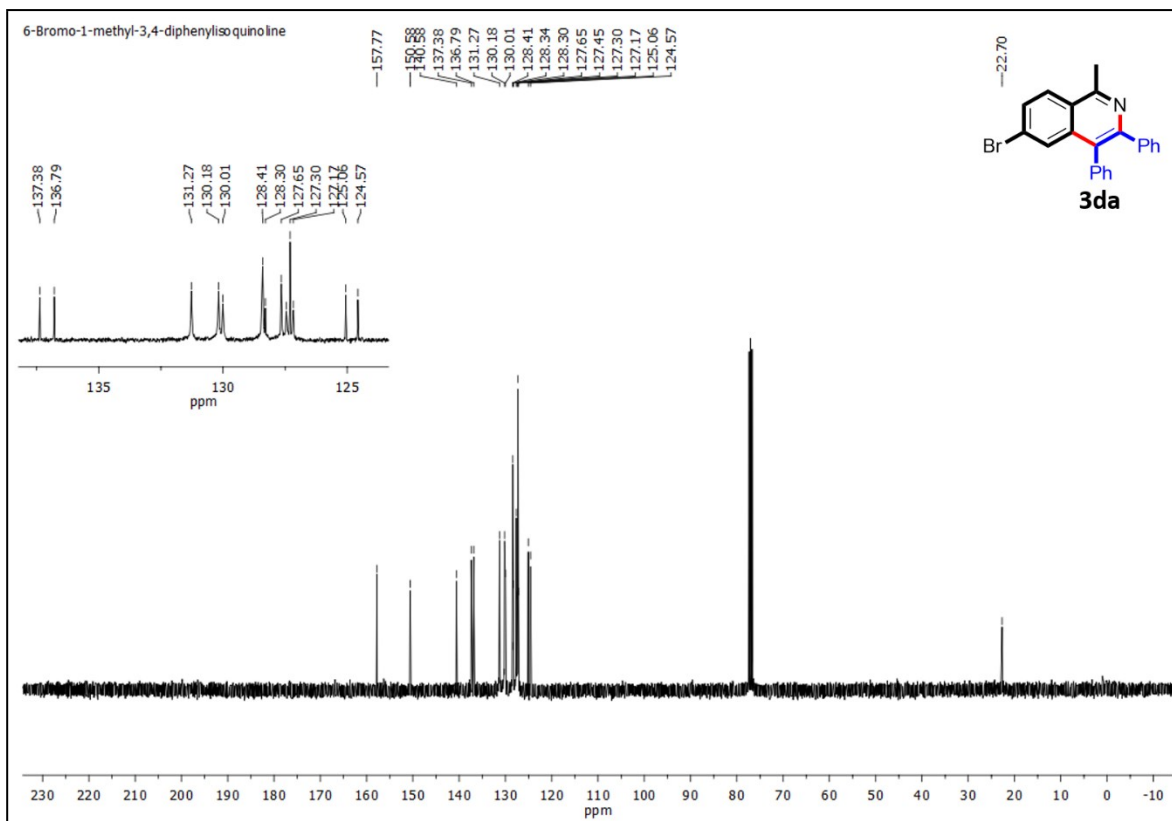

<sup>1</sup>H & <sup>13</sup>C NMR of 6-Chloro-1-methyl-3,4-diphenylisoquinoline (3ea)

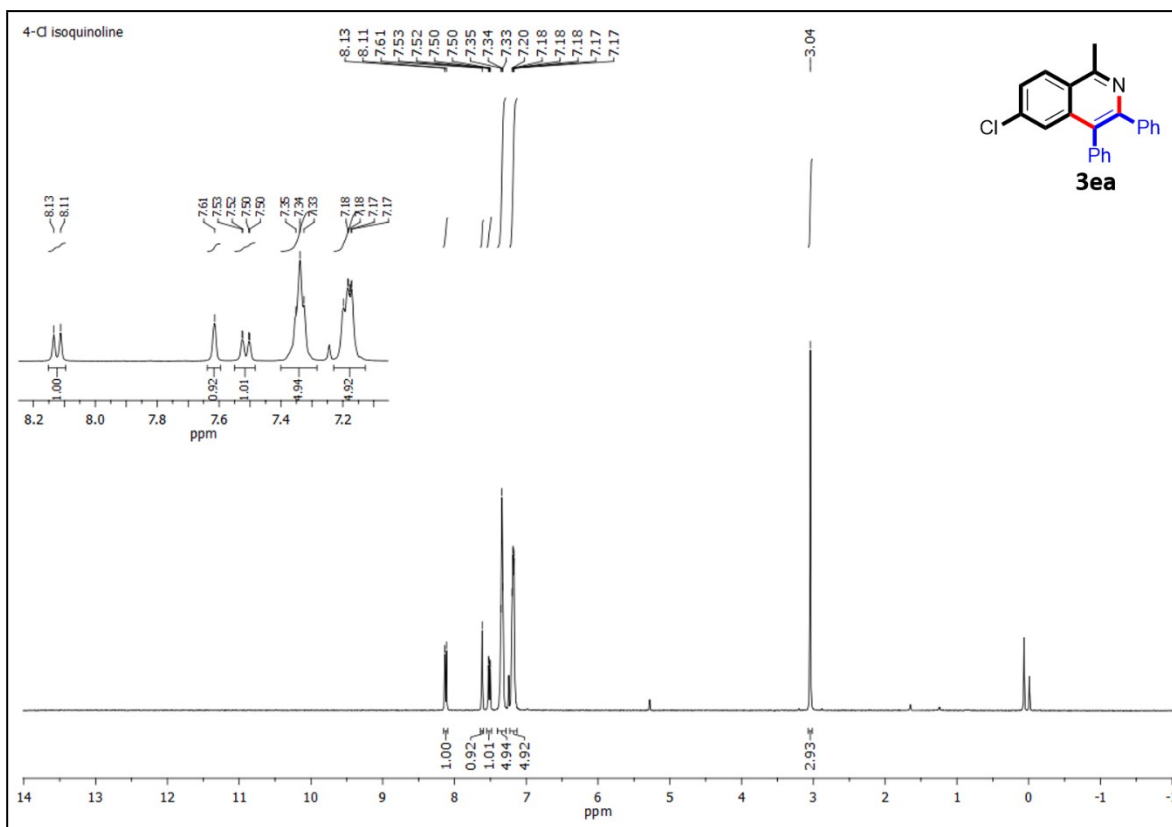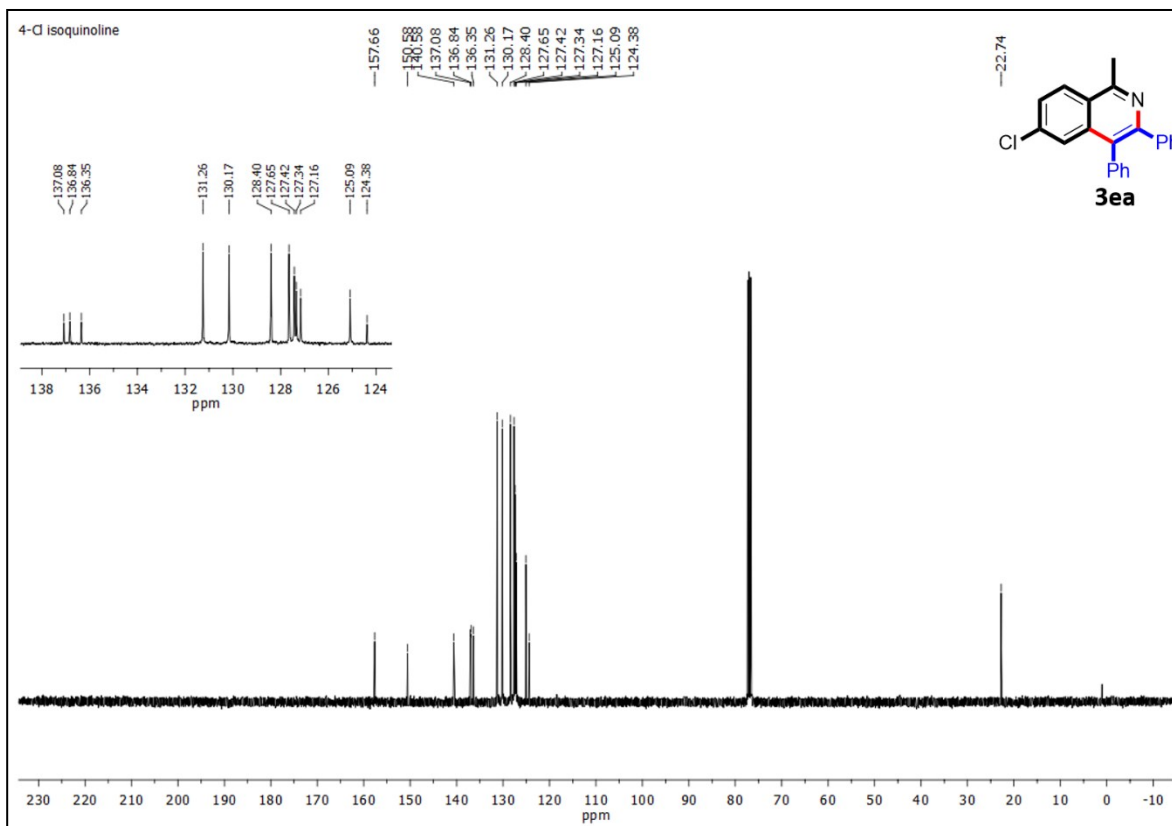

**<sup>1</sup>H & <sup>13</sup>C NMR of 6-Fluoro-1-methyl-3,4-diphenylisoquinoline (3fa)**

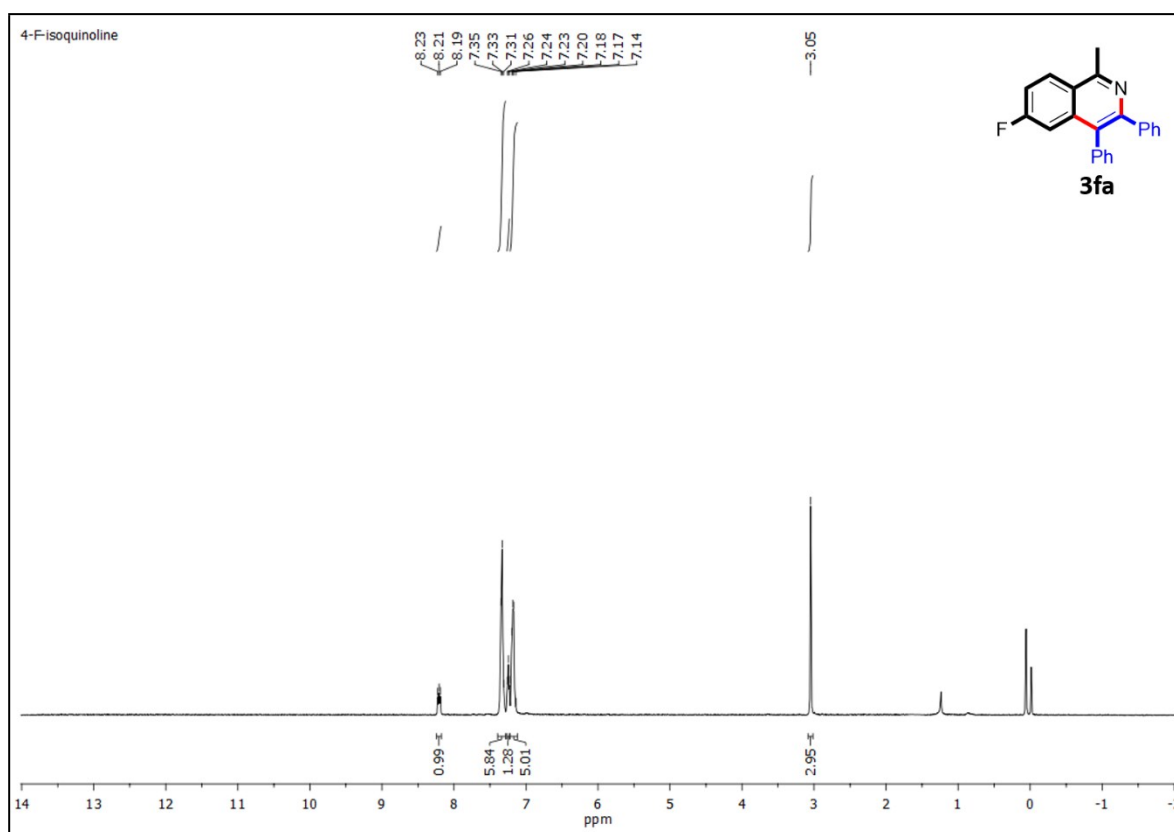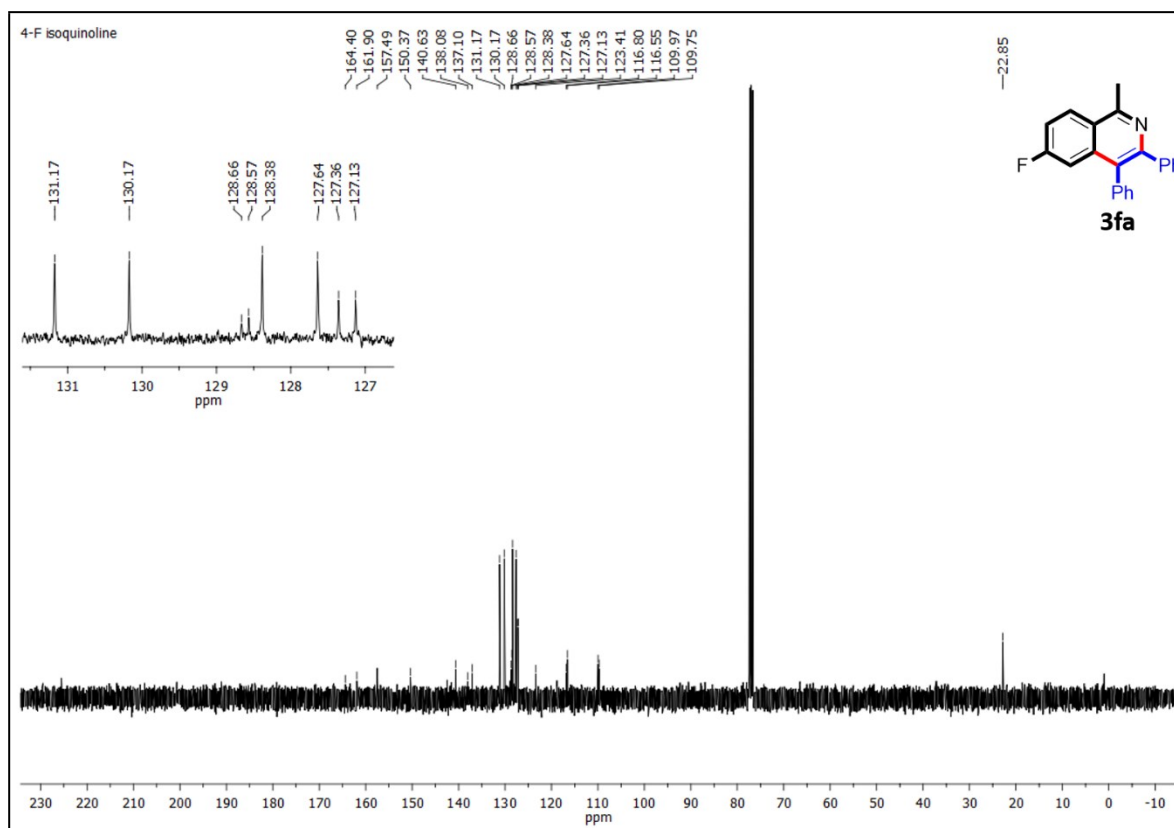

**$^1\text{H}$  &  $^{13}\text{C}$  NMR of 1,7-Dimethyl-3,4-diphenylisoquinoline (3ha)**

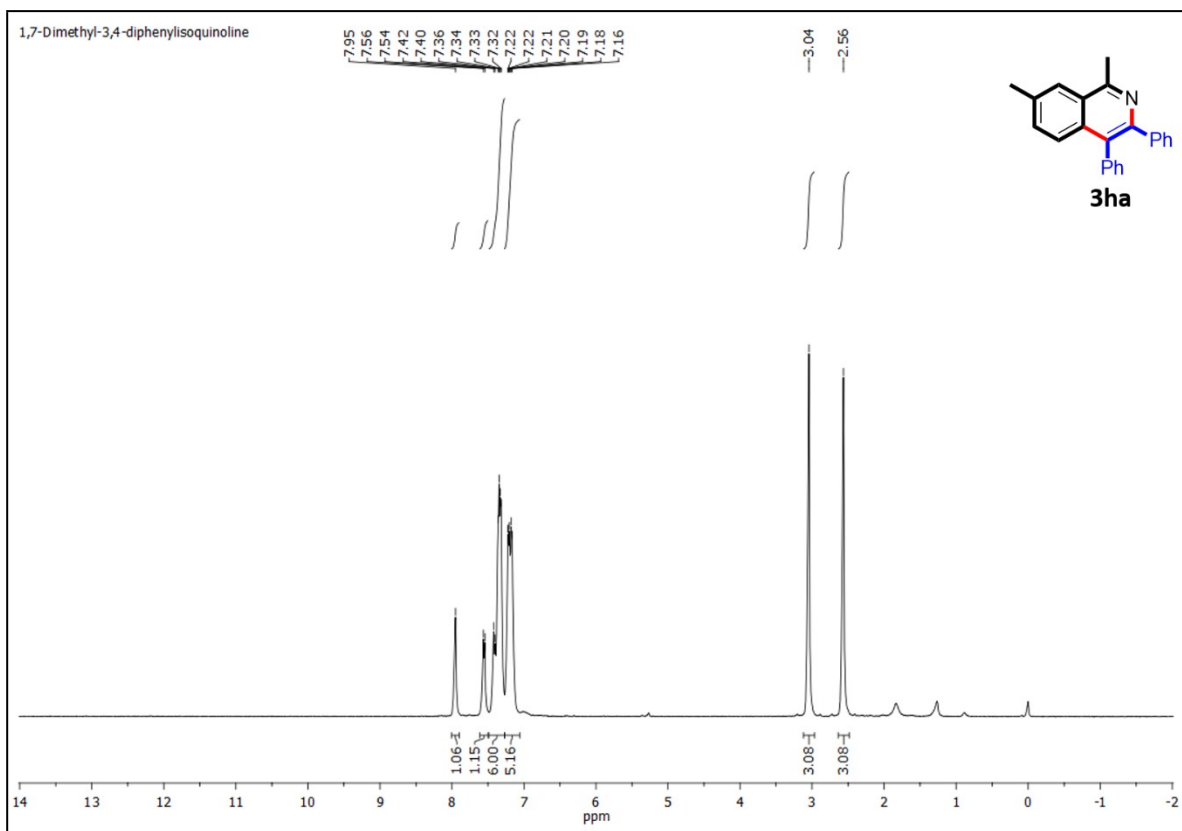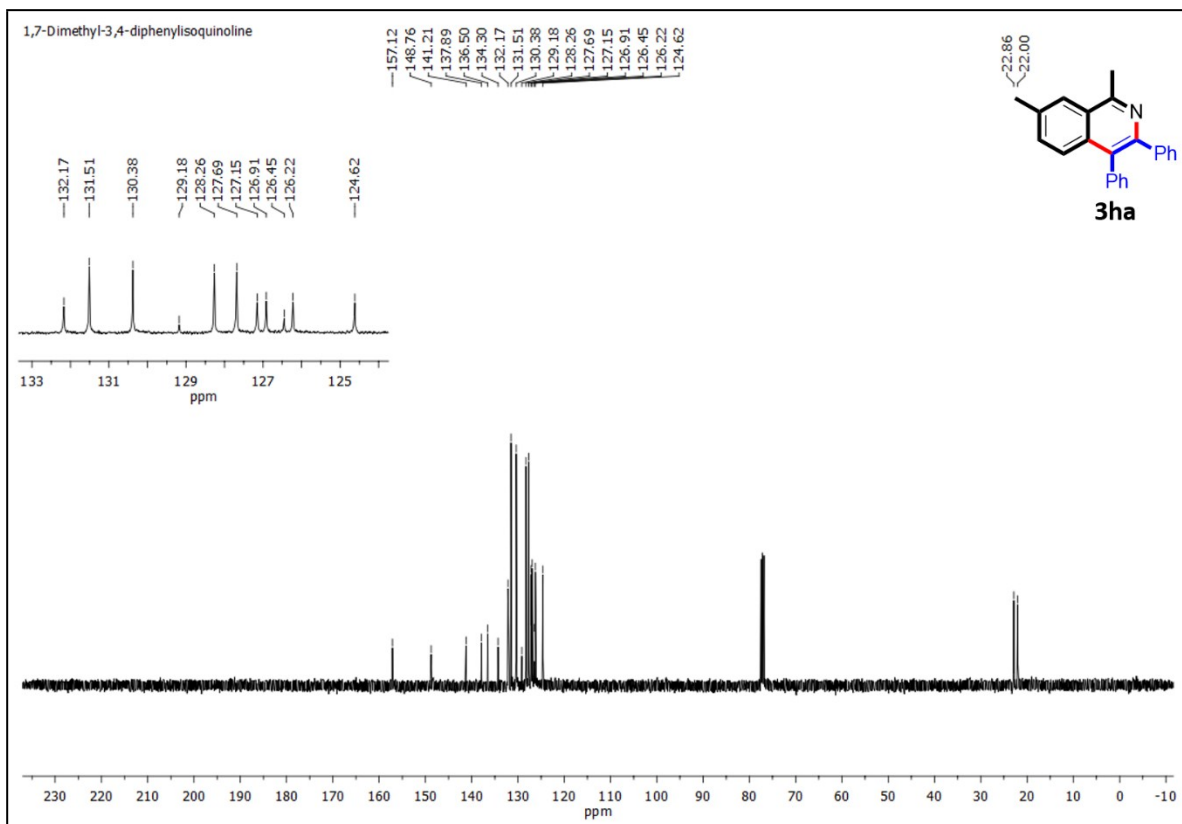



**<sup>1</sup>H & <sup>13</sup>C NMR of 7-methoxy-1-methyl-3,4-diphenylisoquinoline (3ia)**

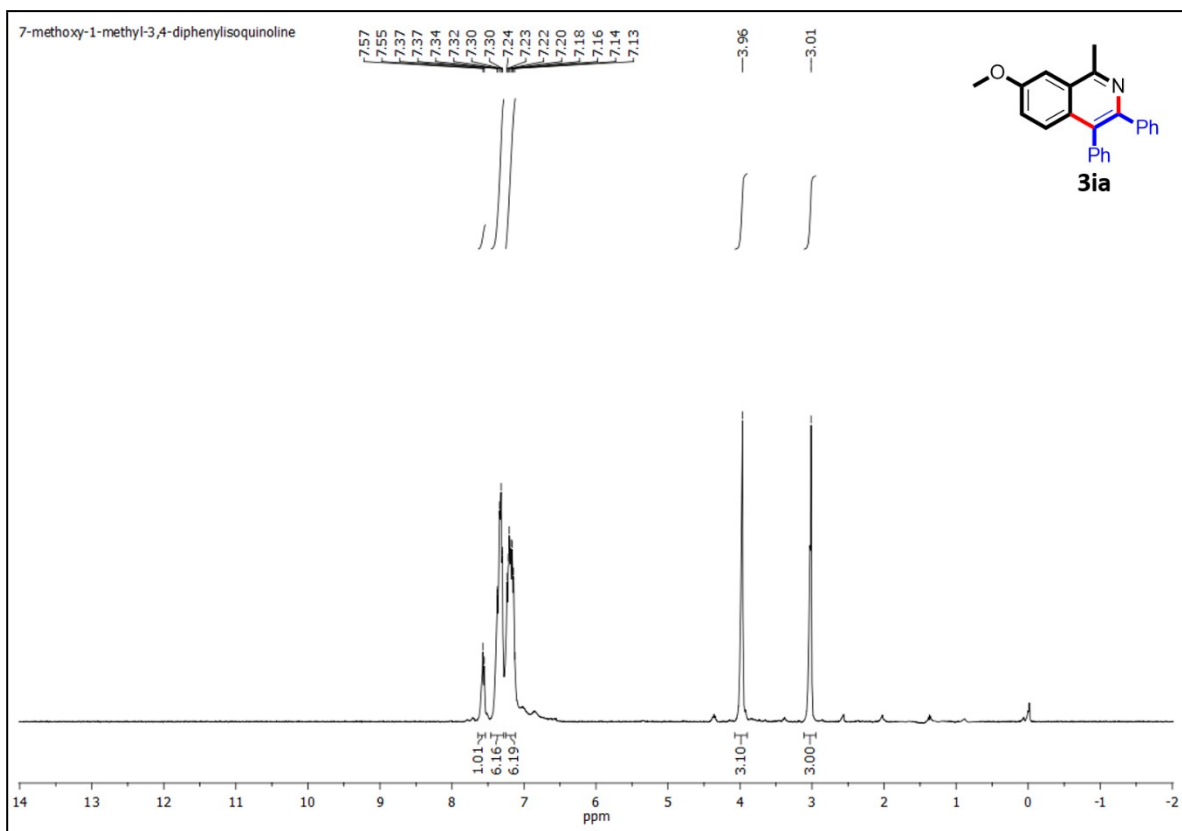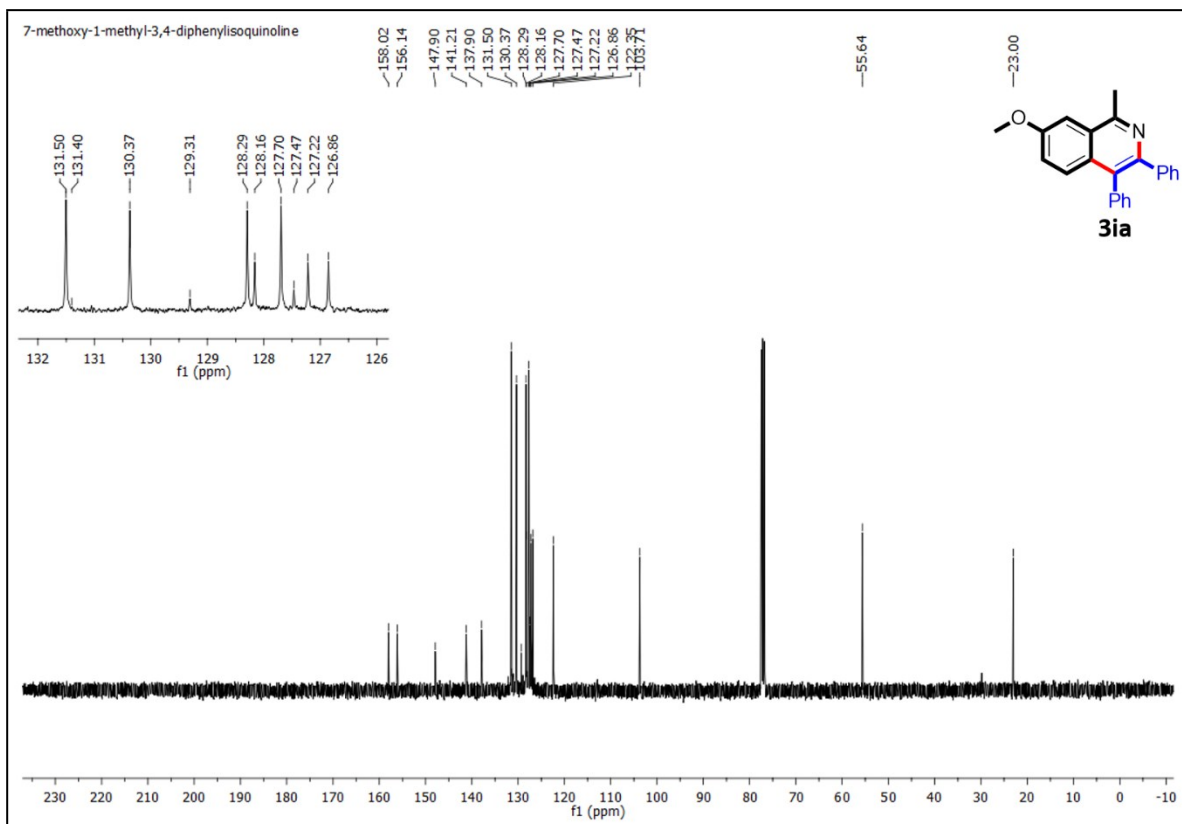

<sup>1</sup>H & <sup>13</sup>C NMR of 5-Methoxy-1-methyl-3,4-diphenylisoquinoline (3ia')

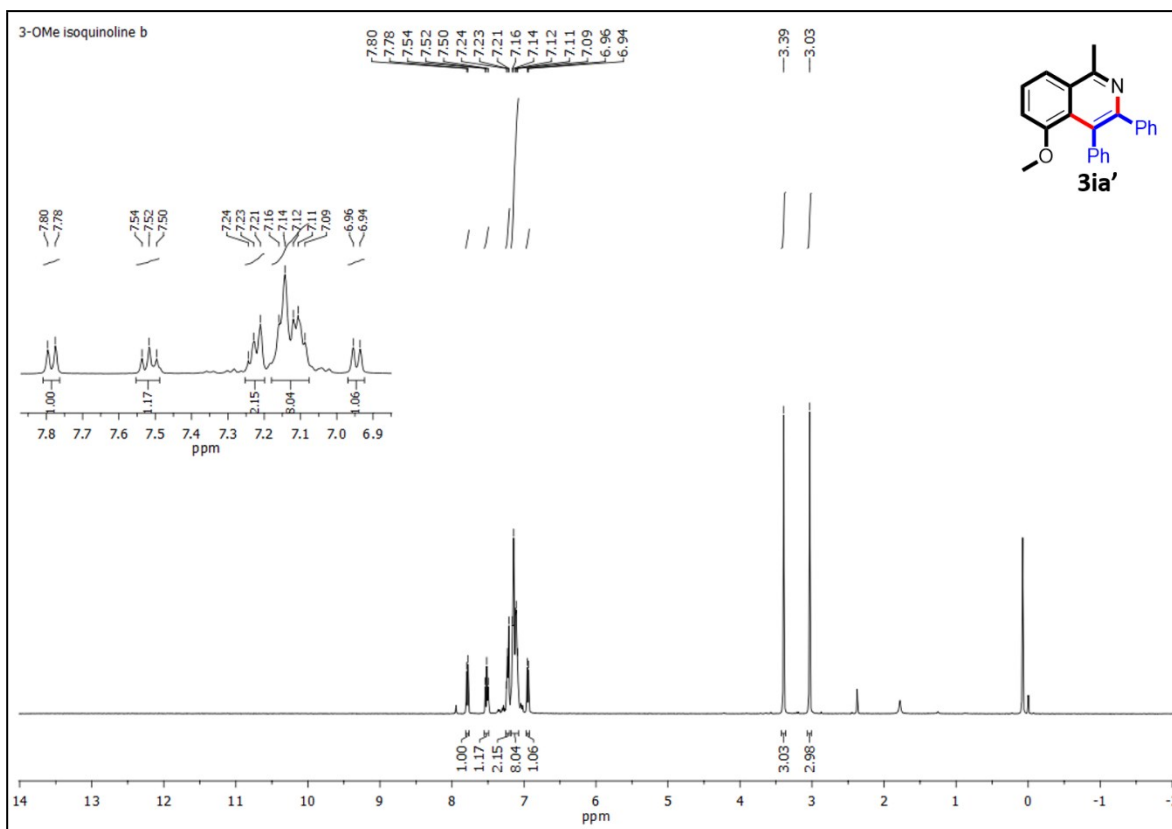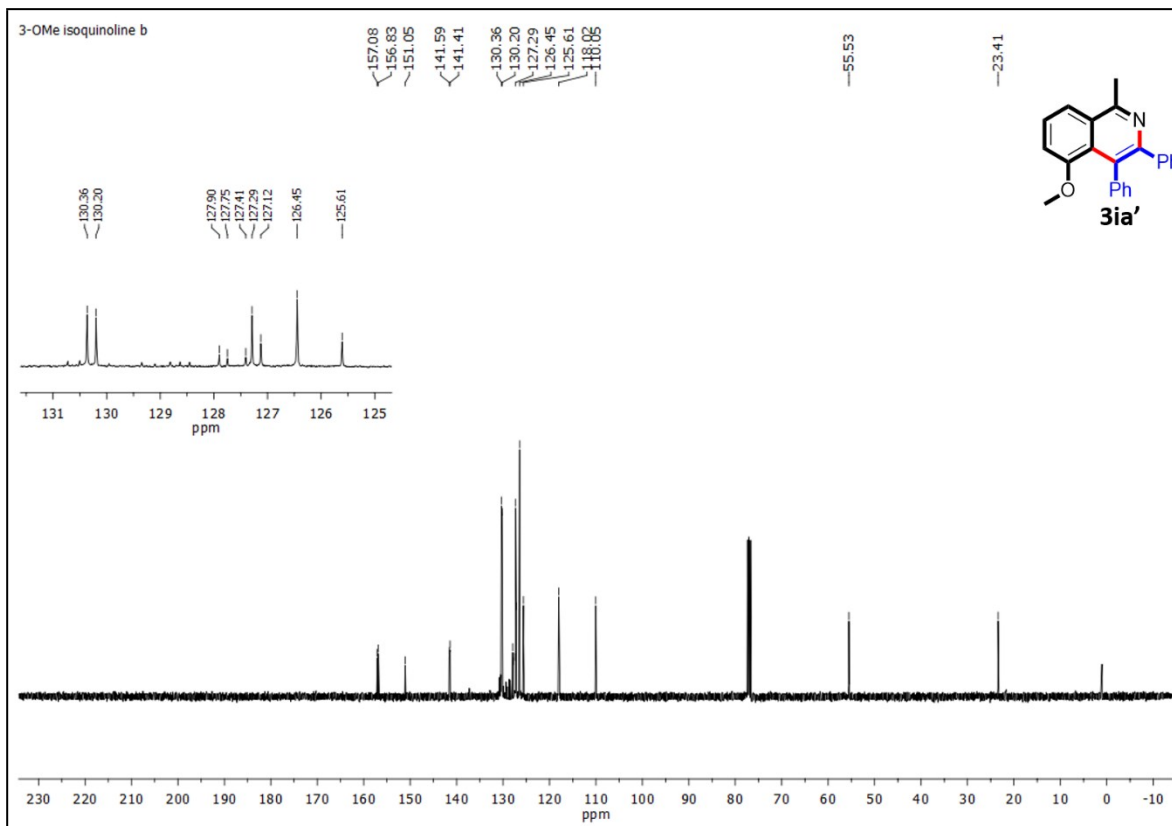

**<sup>1</sup>H & <sup>13</sup>C NMR of 7-Chloro-1-methyl-3,4-diphenylisoquinoline (3ka)**

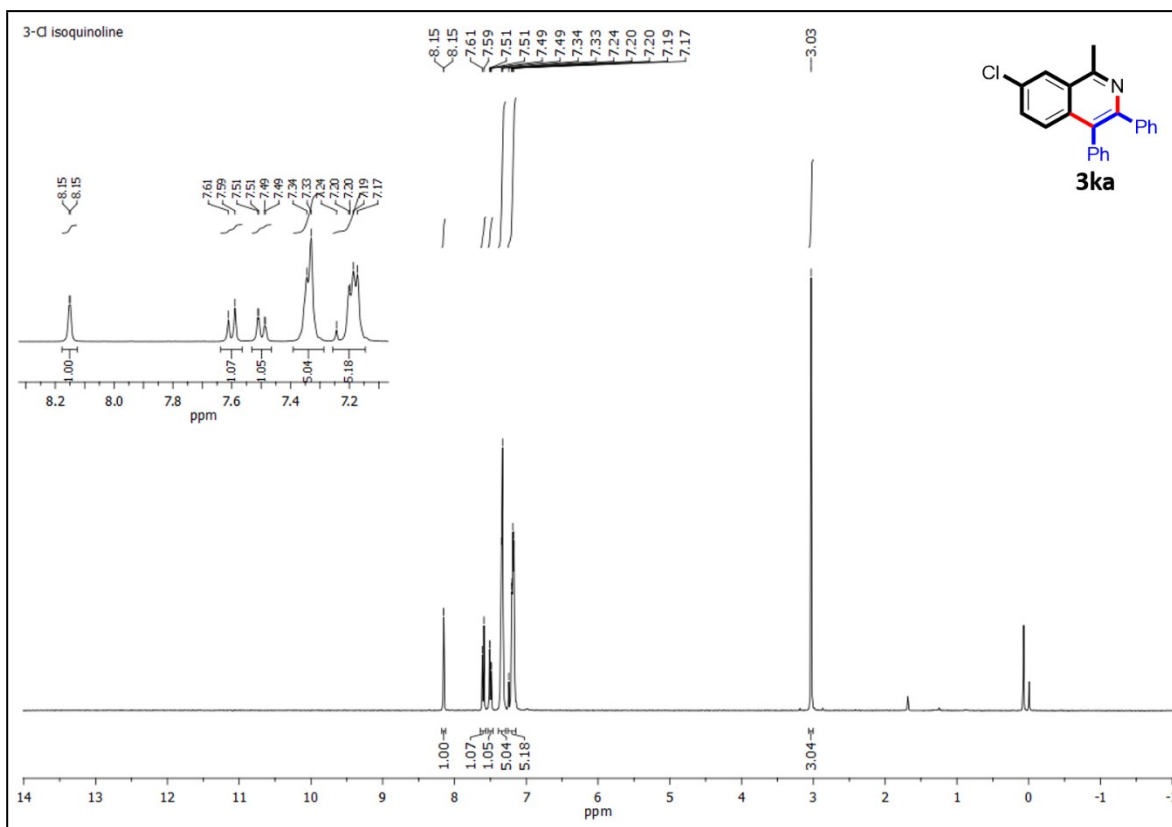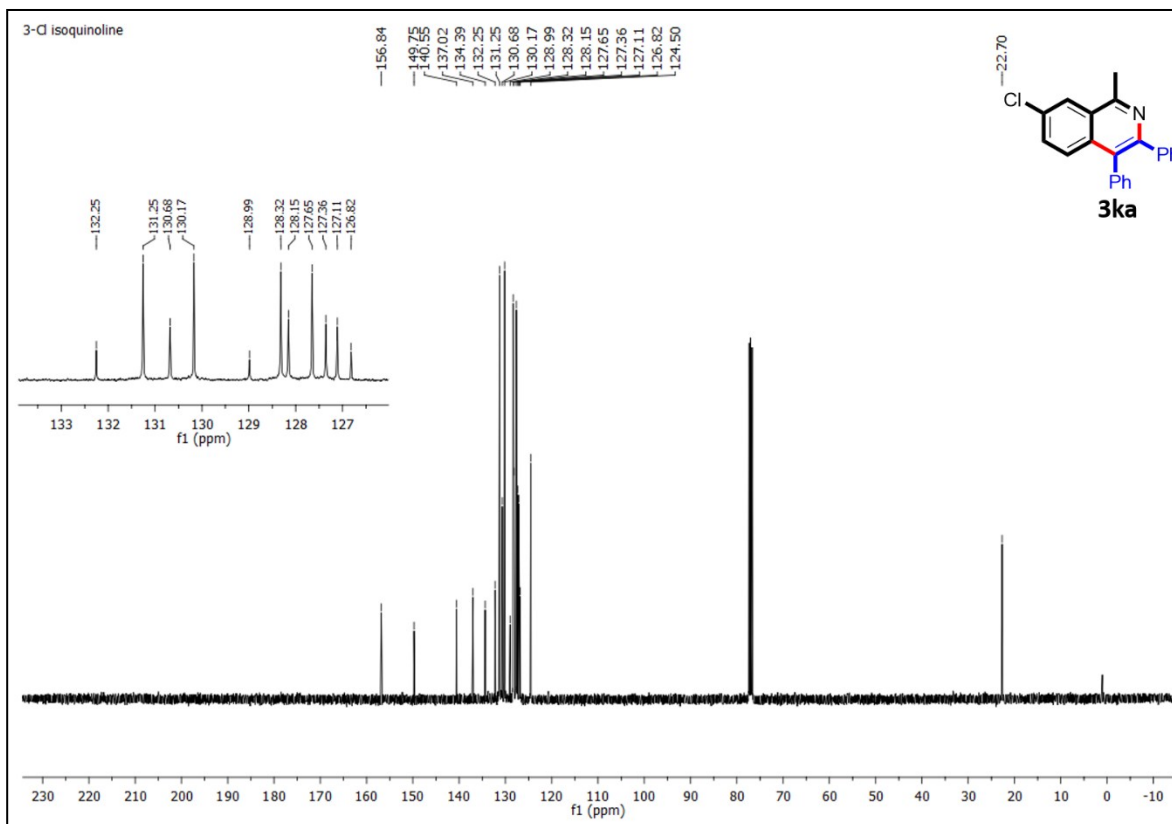

**<sup>1</sup>H & <sup>13</sup>C NMR of 6-Chloro-1,7-dimethyl-3,4-diphenylisoquinoline (3la)**

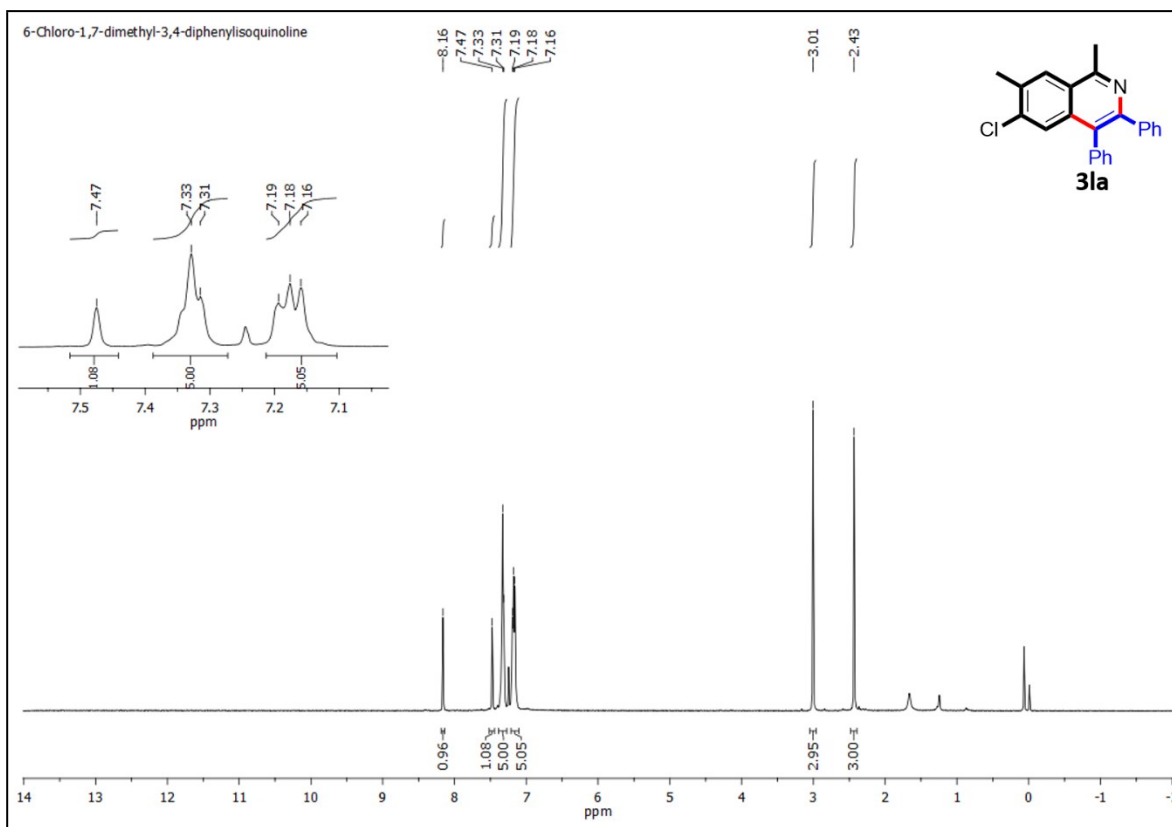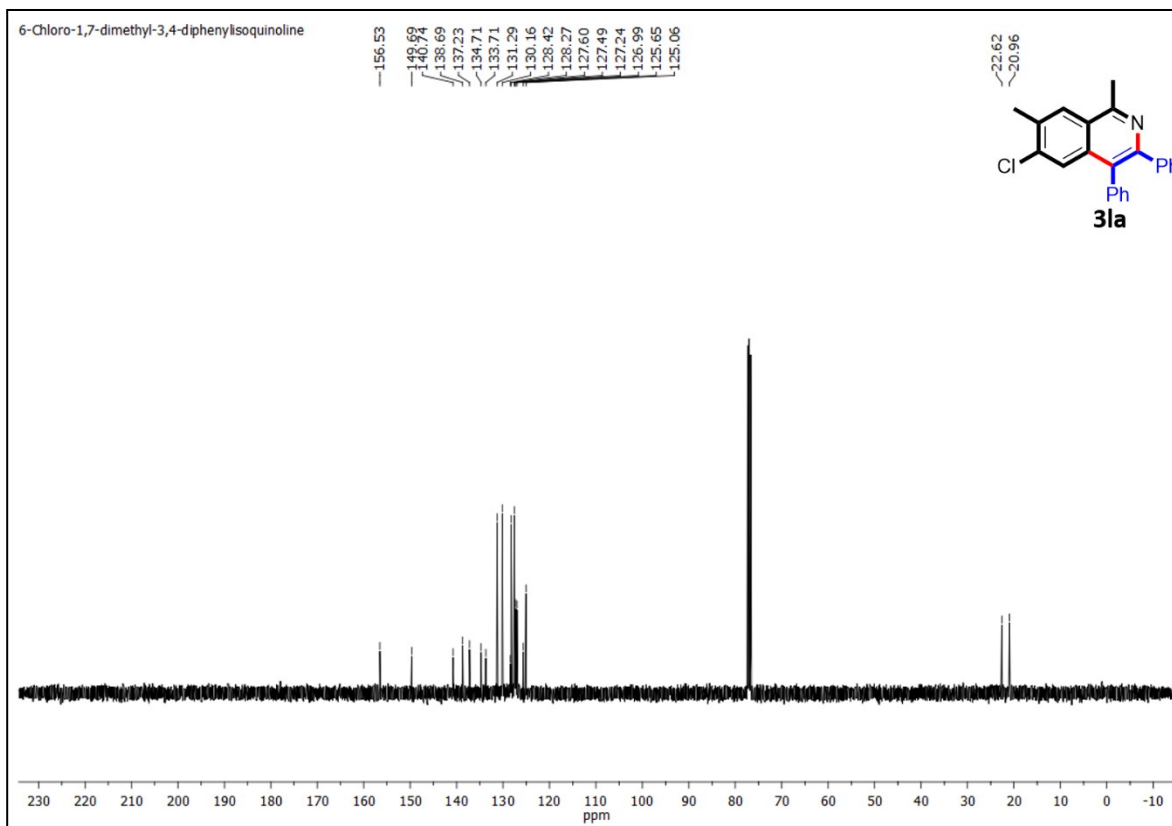

**<sup>1</sup>H & <sup>13</sup>C NMR of 1-Ethyl-3,4-diphenylisoquinoline (3na)**

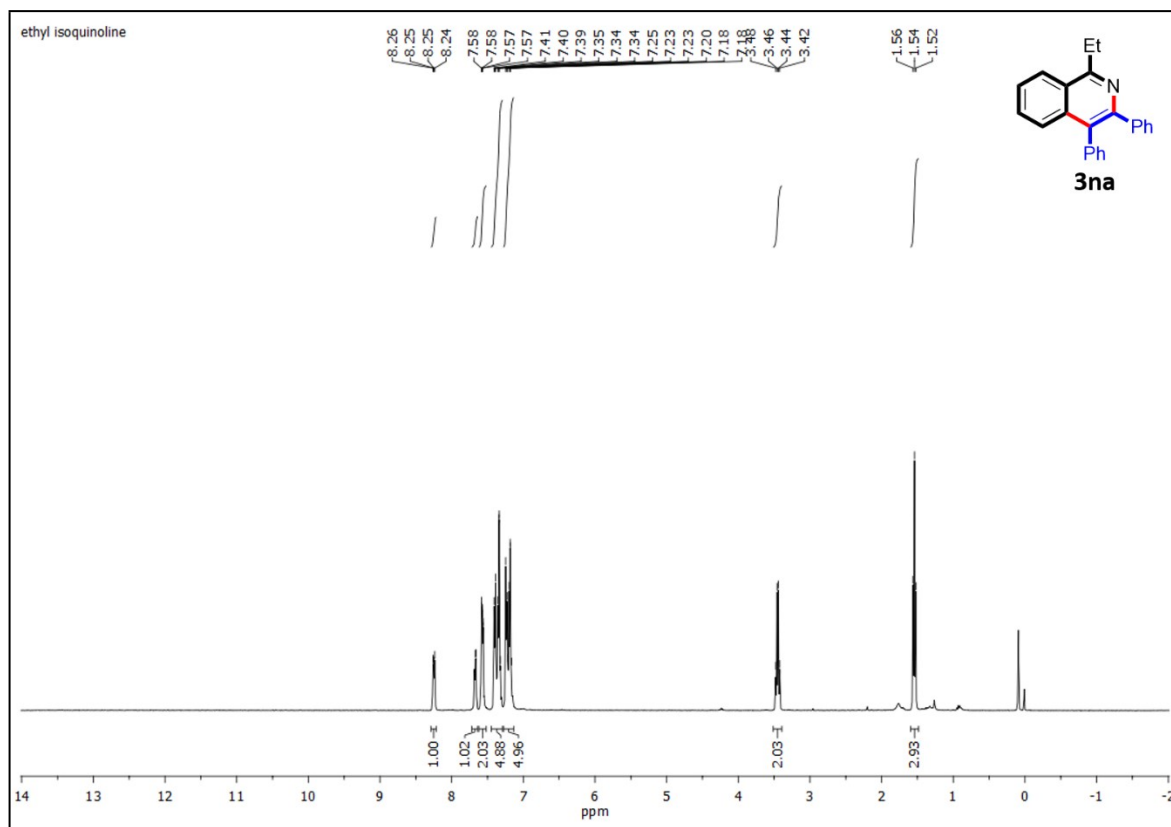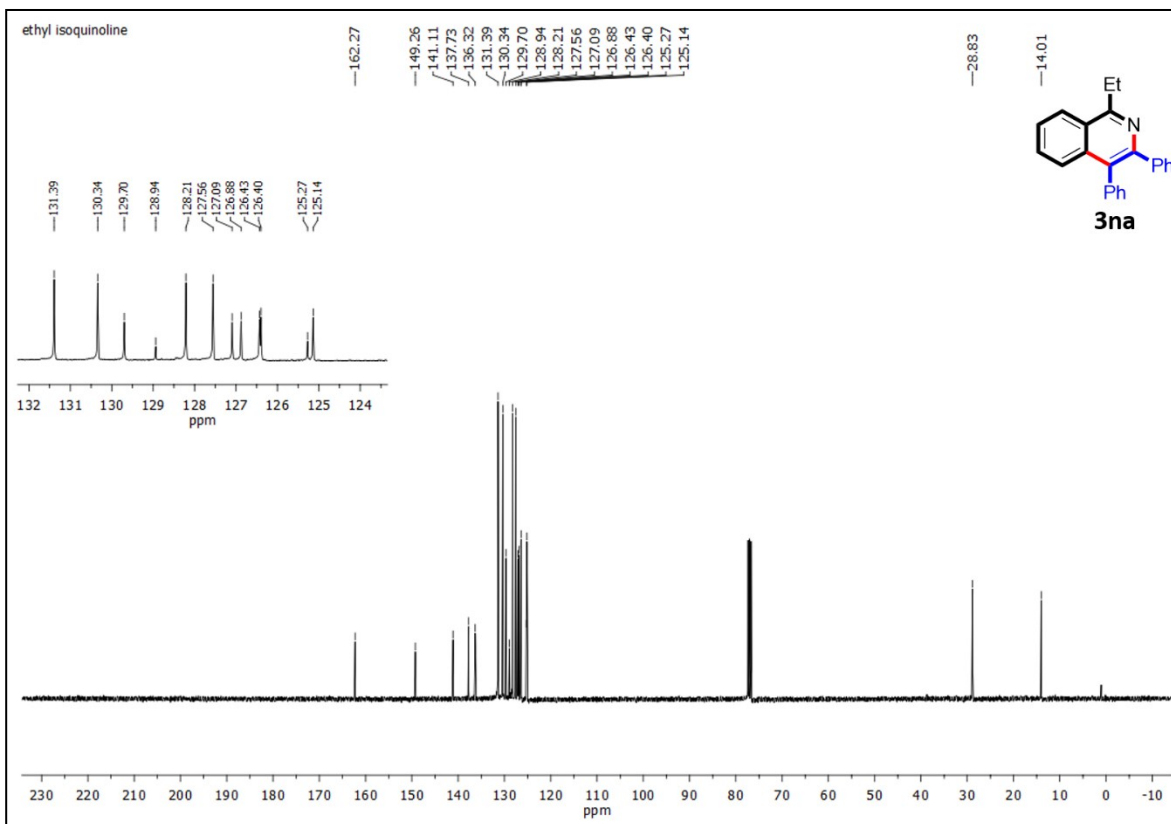

**<sup>1</sup>H & <sup>13</sup>C NMR of 1-Cyclopropyl-3,4-diphenylisoquinoline (30a)**

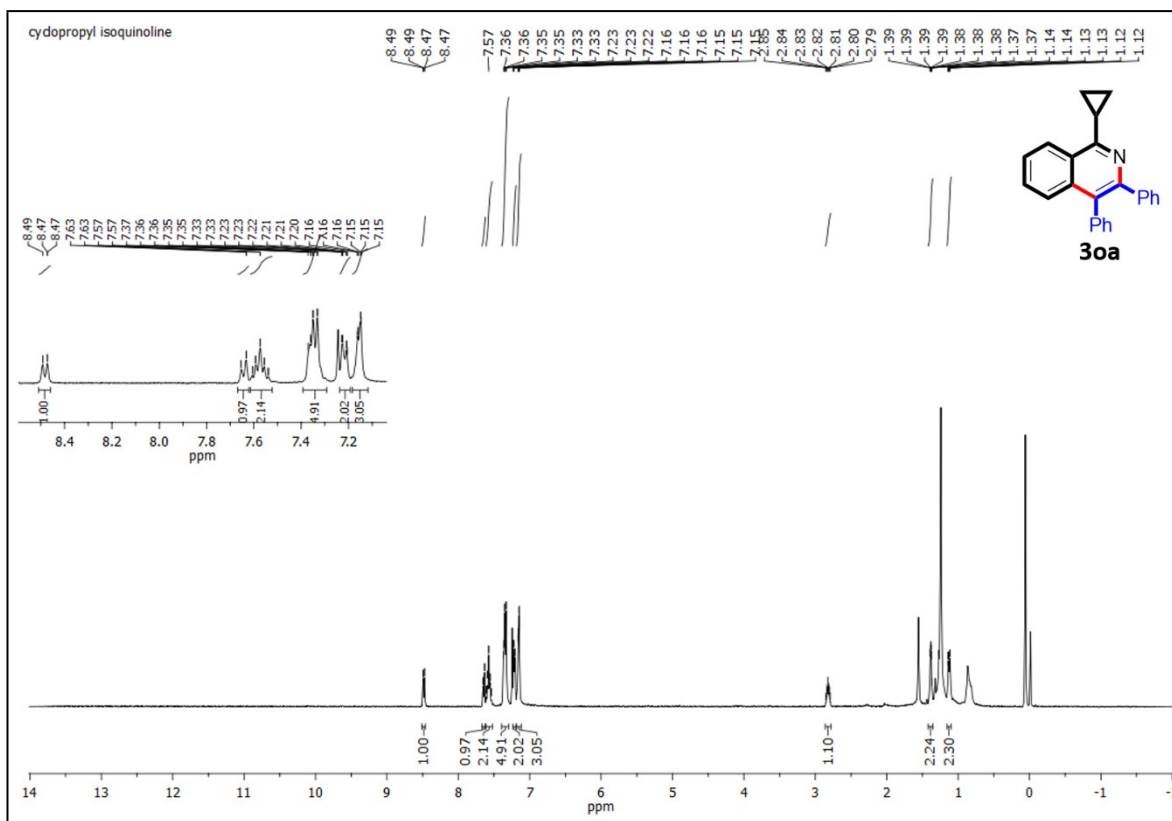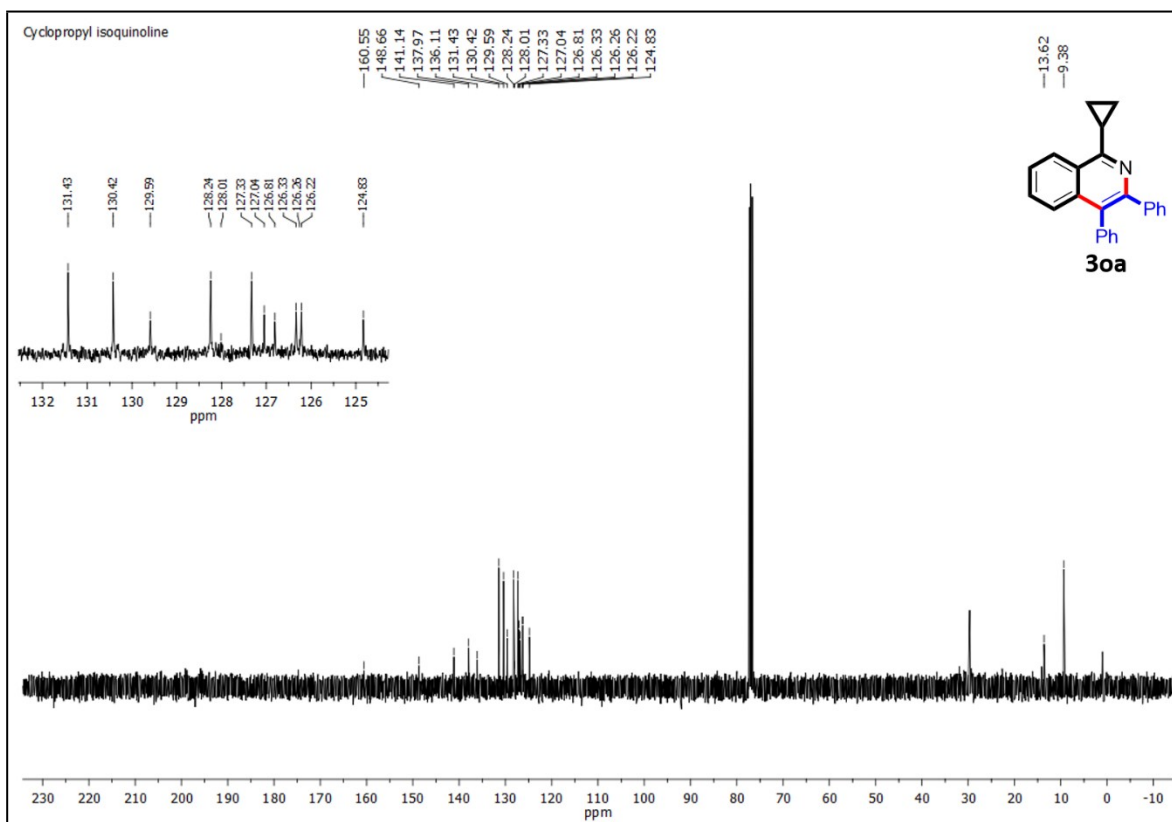

<sup>1</sup>H & <sup>13</sup>C NMR of 1,3,4-Triphenylisoquinoline (3pa)

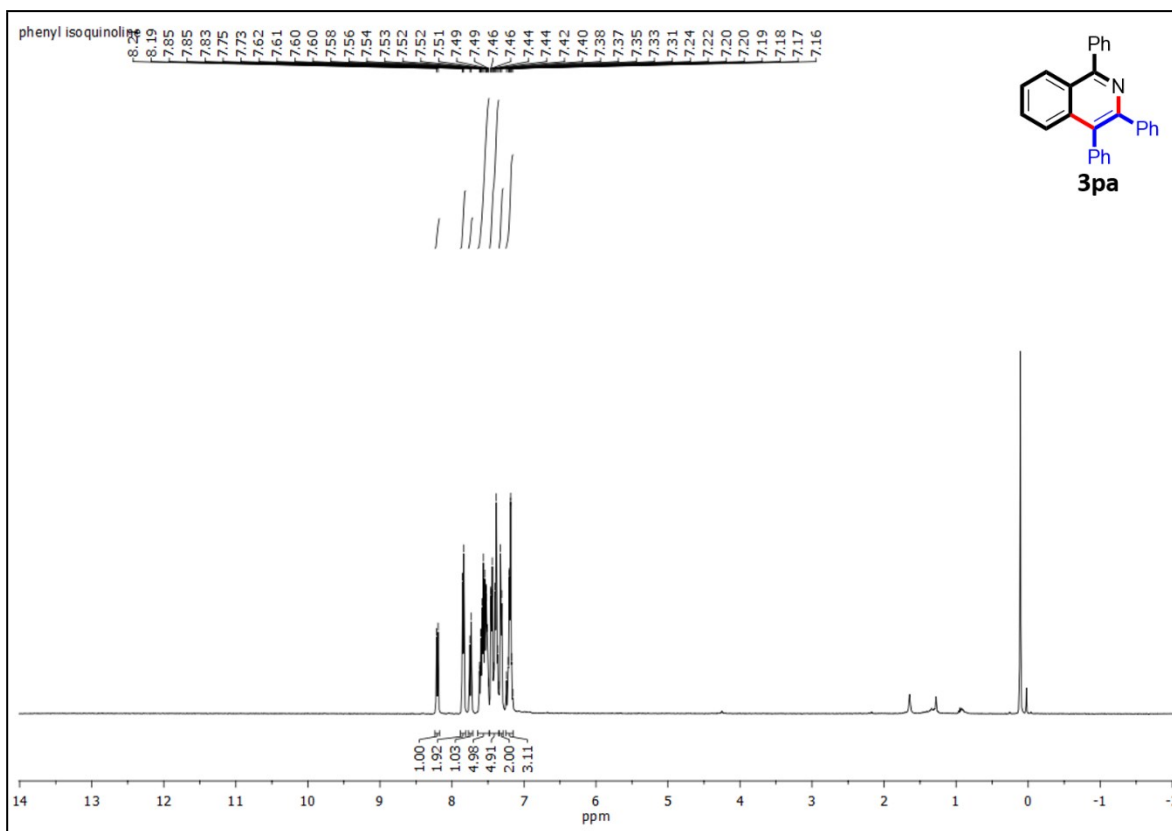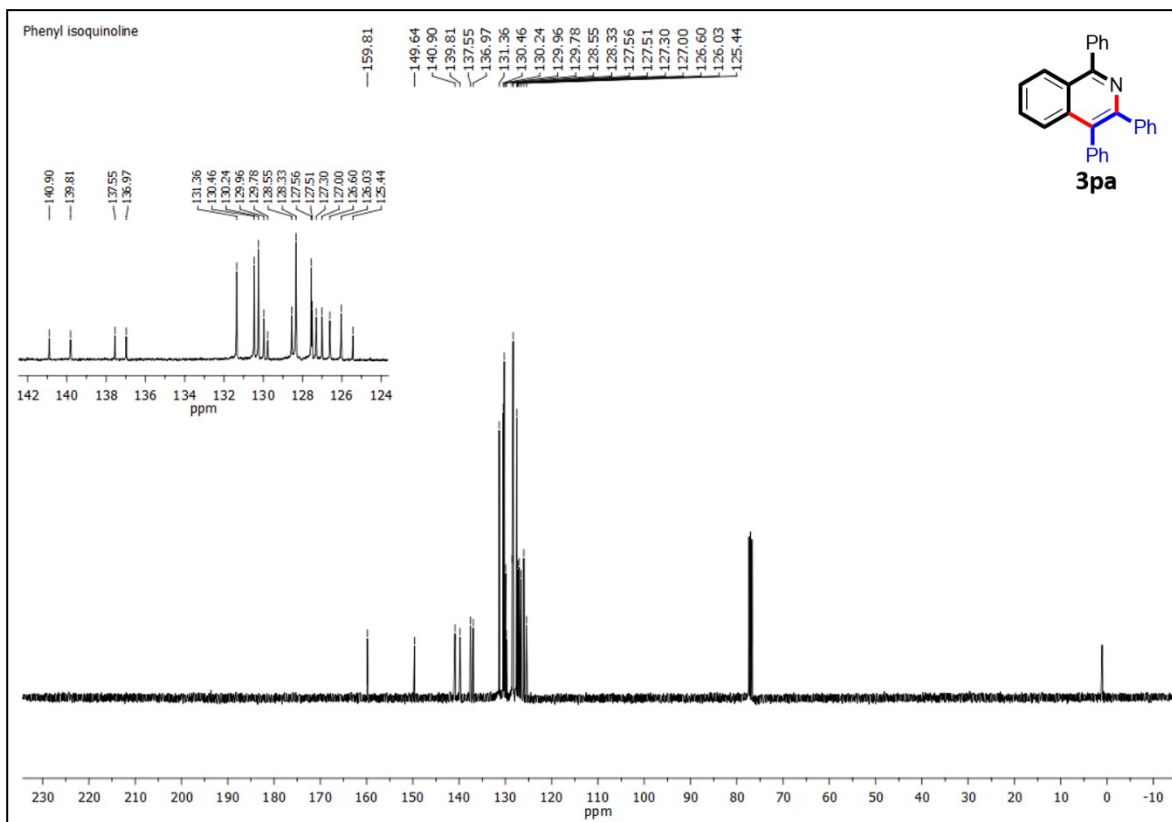

**<sup>1</sup>H & <sup>13</sup>C NMR of 1-Methyl-3,4-diphenylbenzo[h]isoquinoline (3sa)**

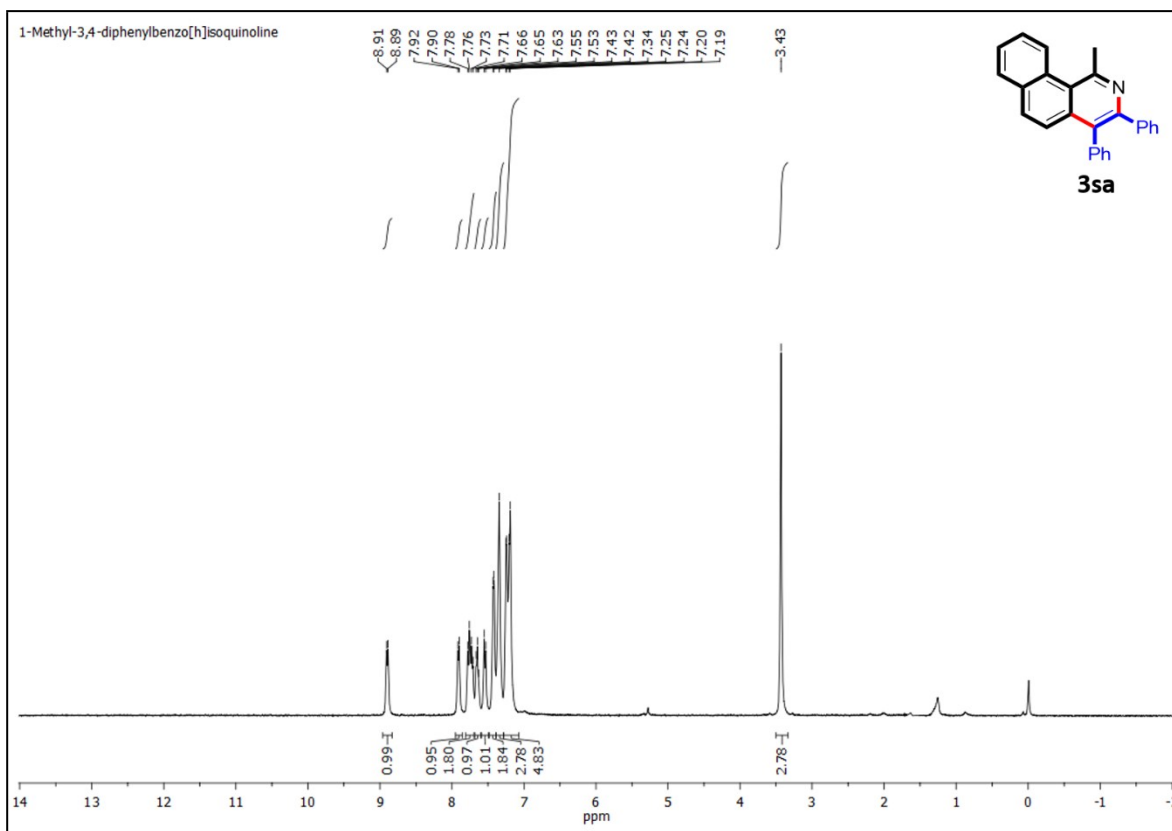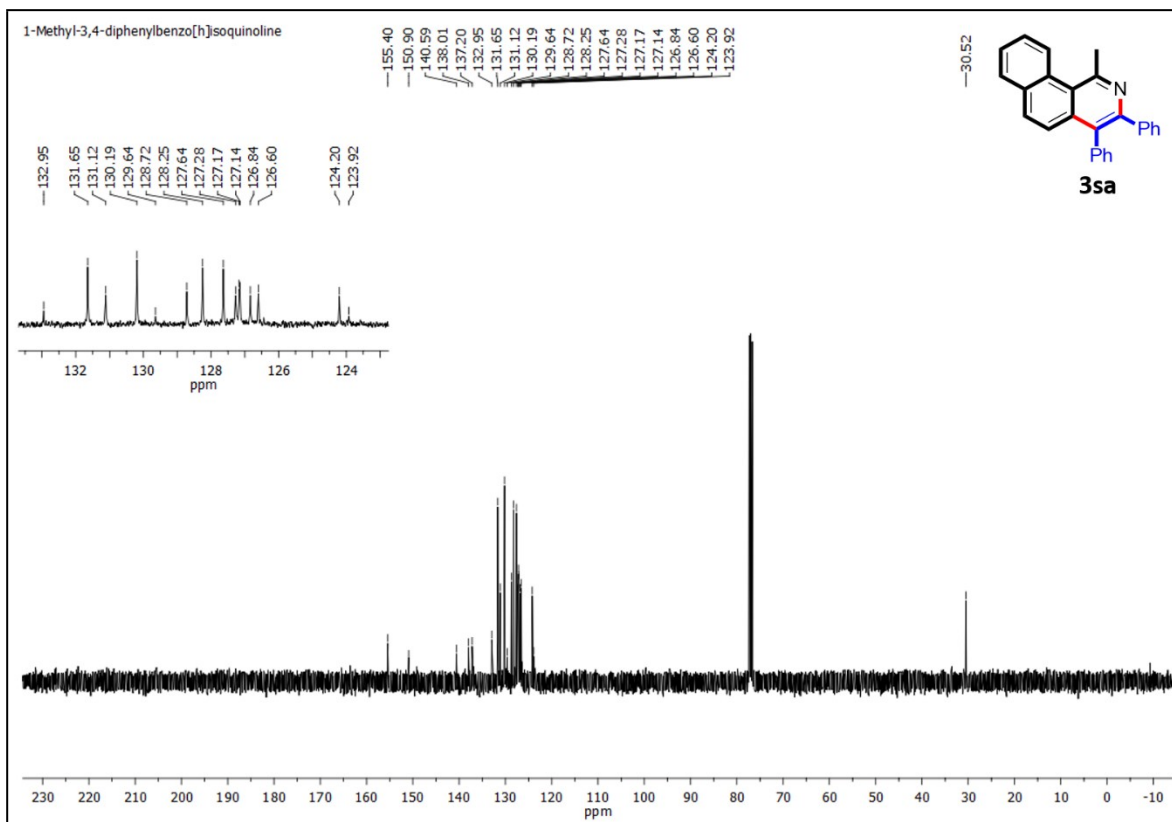



<sup>1</sup>H & <sup>13</sup>C NMR of 7-Methyl-4,5-diphenylthieno[2,3-c]pyridine (3ta)

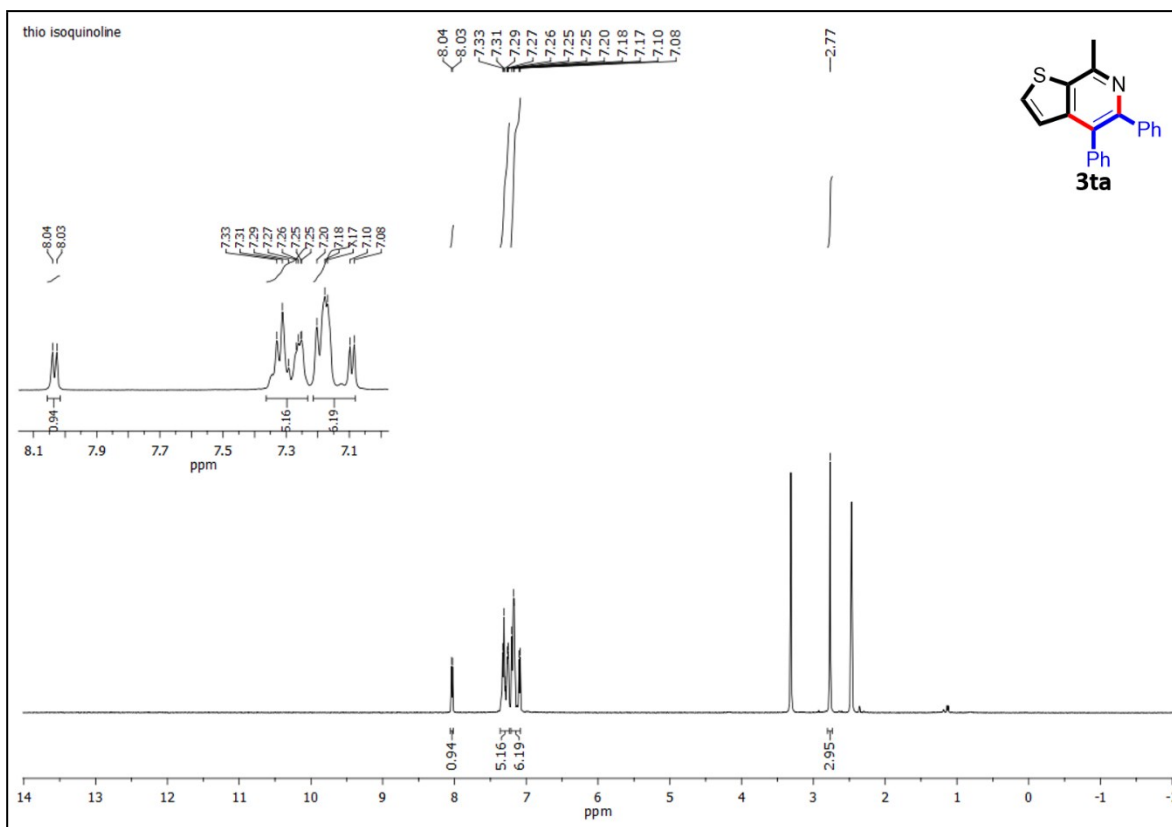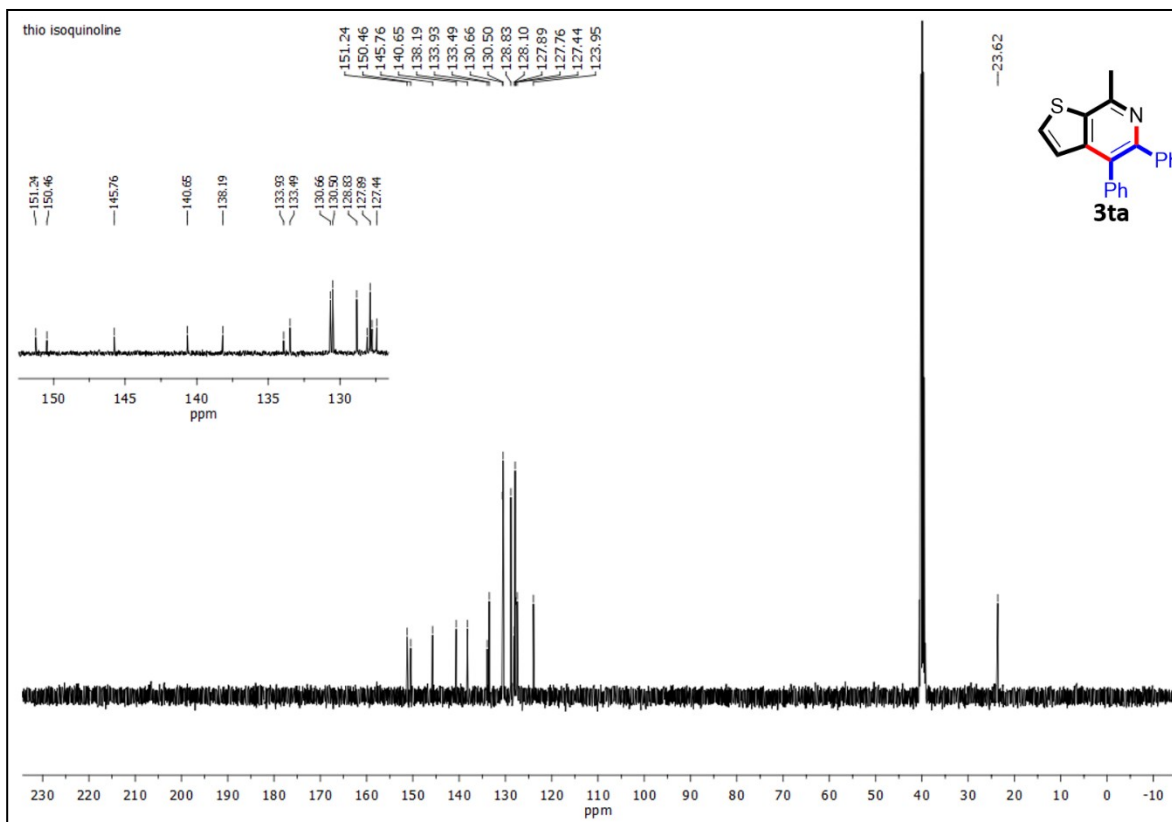

**$^1\text{H}$  &  $^{13}\text{C}$  NMR of 3,4-Diethyl-1-methylisoquinoline (3ab)**

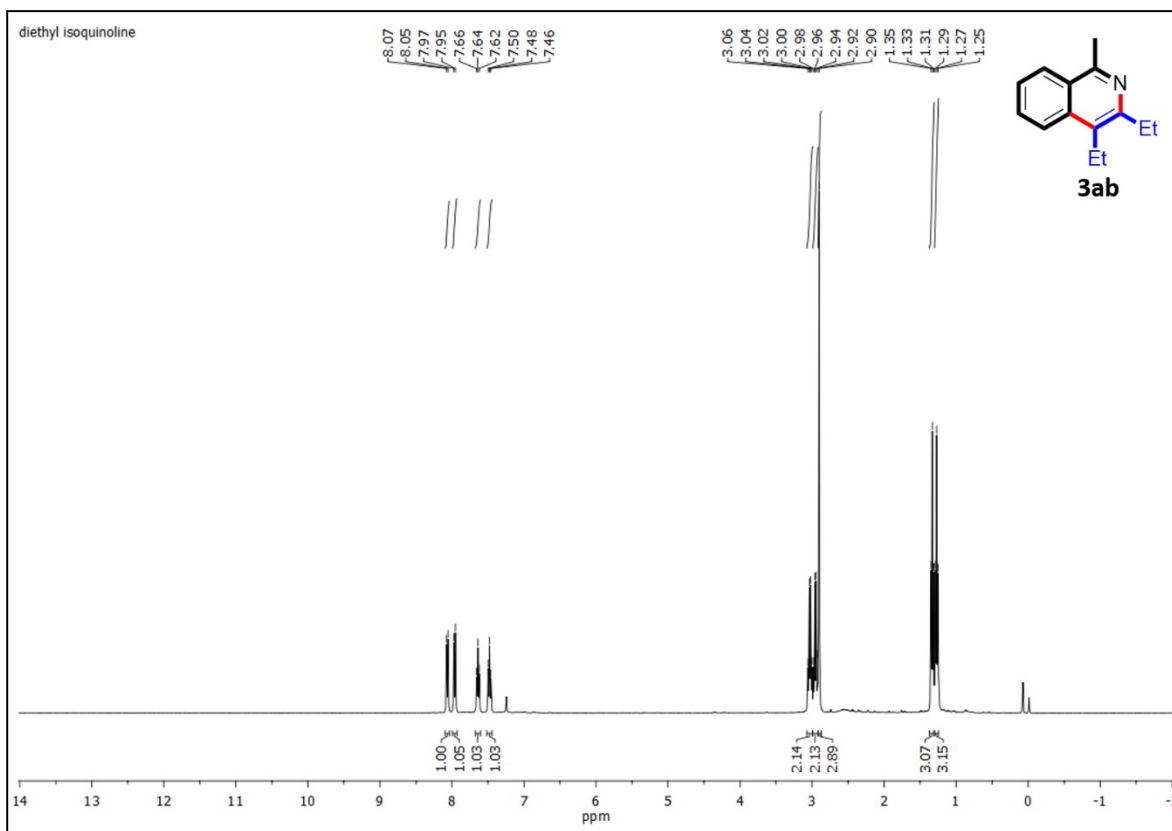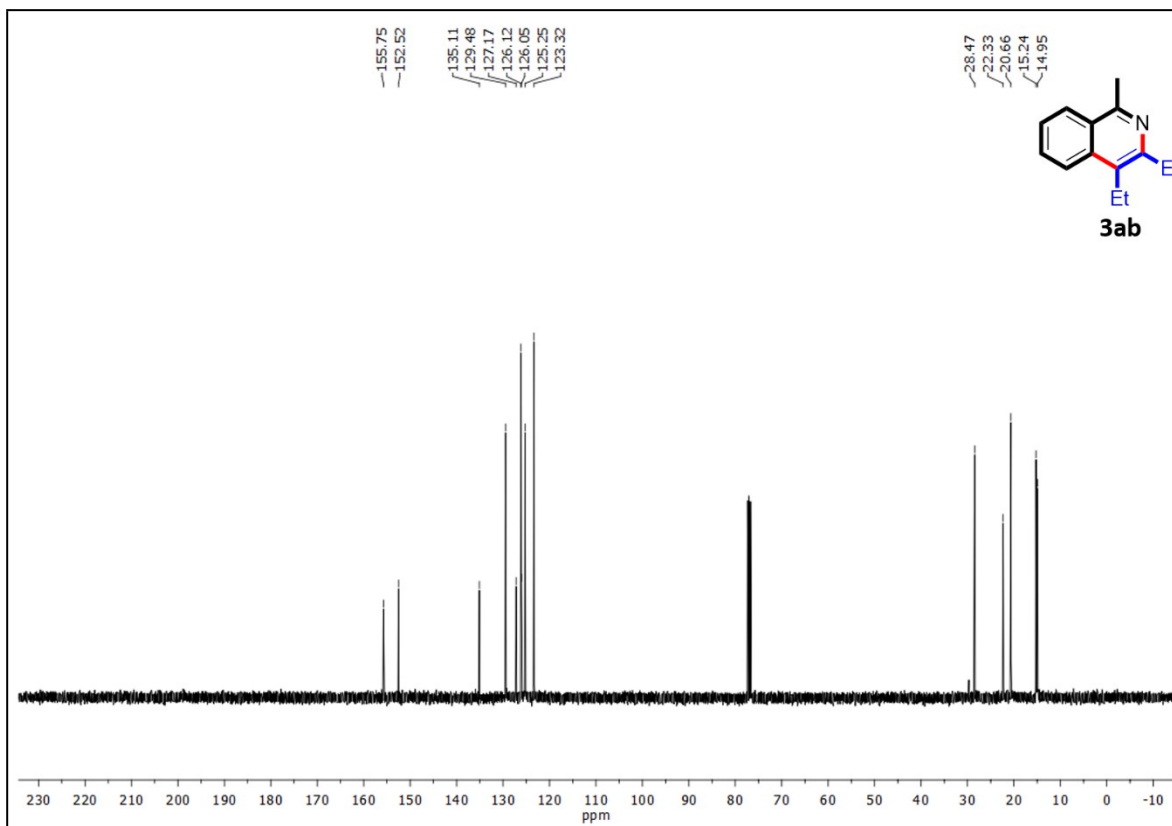

**<sup>1</sup>H & <sup>13</sup>C NMR of 4-ethyl-1-methyl-3-phenylisoquinoline (3ac)**

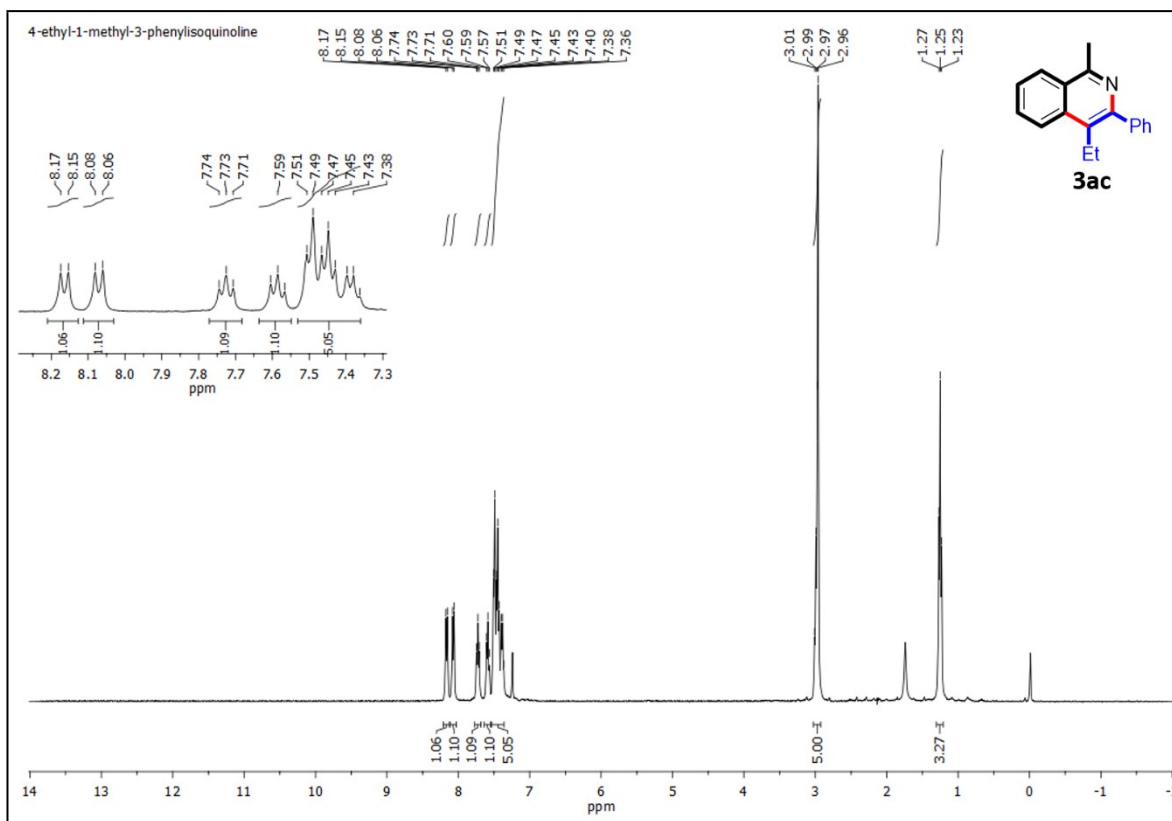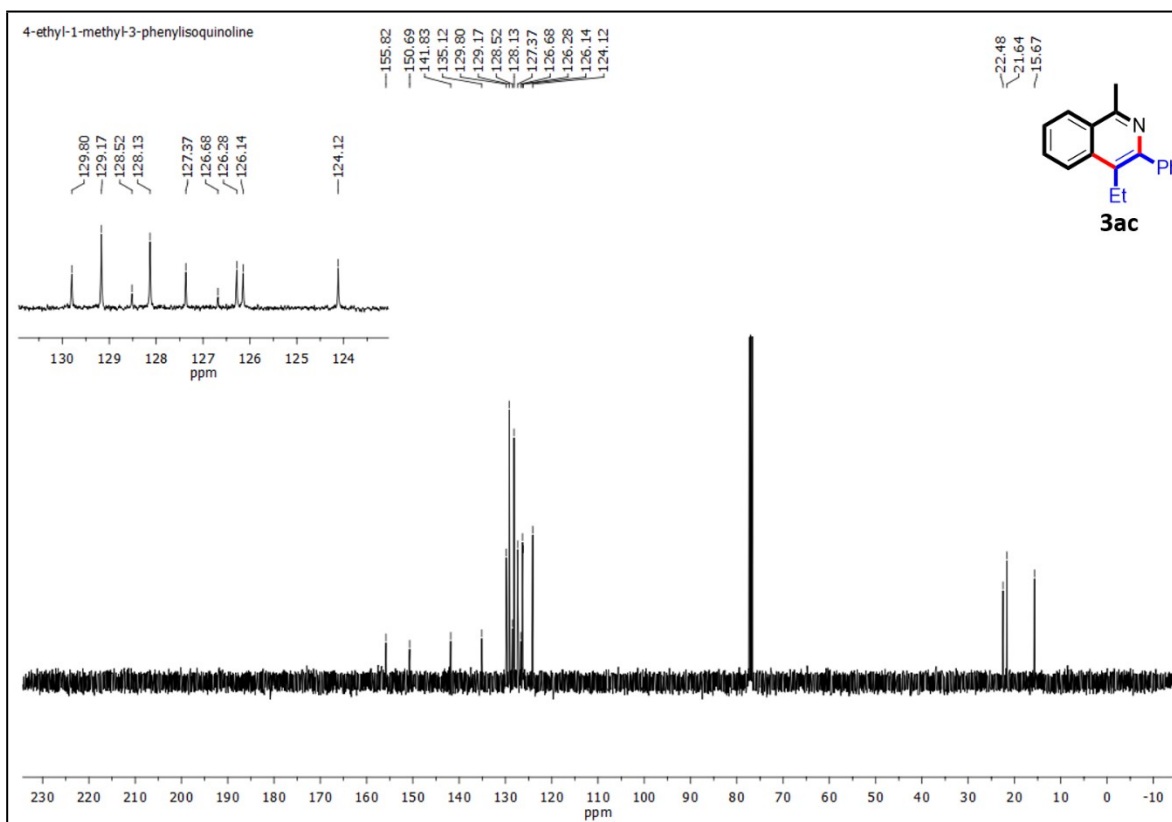

Supplement: c8ob01082j1.pdf [file c8ob01082j1.pdf]
